1 Phase separation of both a plant virus movement protein and cellular factors support virus-host  
2 interactions

3

4 Shelby L. Brown<sup>1</sup> and Jared P. May<sup>1\*</sup>

5

6 <sup>1</sup>Department of Cell and Molecular Biology and Biochemistry, School of Biological and Chemical  
7 Sciences, University of Missouri-Kansas City, Kansas City, MO 64110, USA

8 \*Correspondence: [jpmay@umkc.edu](mailto:jpmay@umkc.edu)

9 Short title: Plant virus protein phase separation

10 Keywords: phase separation, LLPS, liquid-liquid phase separation, RNA virus, stress granule,  
11 biomolecular condensate, fibrillarin, virus movement, virus replication, G3BP

## 12 **ABSTRACT**

13 Phase separation concentrates biomolecules, which should benefit RNA viruses that  
14 must sequester viral and host factors during an infection. Here, the p26 movement protein from  
15 *Pea enation mosaic virus 2* (PEMV2) was found to phase separate and partition in nucleoli and  
16 G3BP stress granules (SGs) *in vivo*. Electrostatic interactions drive p26 phase separation as  
17 mutation of basic (R/K-G) or acidic (D/E-G) residues either blocked or reduced phase  
18 separation, respectively. During infection, p26 must partition inside the nucleolus and interact  
19 with fibrillarin (Fib2) as a pre-requisite for systemic trafficking of viral RNAs. Partitioning of p26  
20 in pre-formed Fib2 droplets was dependent on p26 phase separation suggesting that phase  
21 separation of viral movement proteins supports nucleolar partitioning and virus movement.  
22 Furthermore, viral ribonucleoprotein complexes containing p26, Fib2, and PEMV2 RNA were  
23 formed via phase separation *in vitro* and could provide the basis for self-assembly *in planta*.  
24 Interestingly, both R/K-G and D/E-G p26 mutants failed to support systemic trafficking of a  
25 *Tobacco mosaic virus* (TMV) vector in *Nicotiana benthamiana* suggesting that p26 phase  
26 separation, proper nucleolar partitioning, and systemic movement are intertwined. p26 also  
27 partitioned in SGs and G3BP over-expression restricted PEMV2 accumulation >20-fold.  
28 Expression of phase separation-deficient G3BP only restricted PEMV2 5-fold, demonstrating  
29 that G3BP phase separation is critical for maximum antiviral activity.

30

## 31 **AUTHOR SUMMARY**

32 Phase separation of several cellular proteins is associated with forming pathological  
33 aggregates and exacerbating neurodegenerative disease progression. In contrast, roles for viral  
34 protein phase separation in RNA virus lifecycles are less understood. Here, we demonstrate  
35 that the p26 movement protein from *Pea enation mosaic virus 2* phase separates and partitions  
36 with phase-separated cellular proteins fibrillarin and G3BP. The related orthologue from  
37 *Groundnut rosette virus* has been extensively studied and is known to interact with fibrillarin in

38 the nucleolus as a pre-requisite for virus movement. We determined that basic residues and  
39 electrostatic interactions were critical for p26 phase separation. Furthermore, mutation of  
40 charged residues prevented the rescue of a movement-deficient *Tobacco mosaic virus* vector in  
41 *Nicotiana benthamiana*. Stress granules form through phase separation and we found that p26  
42 could partition inside stress granules following heat shock. Phase separation of the stress  
43 granule nucleator G3BP was required for maximum antiviral activity and constitutes a host  
44 response that is dependent on cellular protein phase separation. Collectively, we demonstrate  
45 that phase separation of a plant virus protein facilitates virus-host interactions that are required  
46 for virus movement and phase separation of cellular proteins can simultaneously restrict virus  
47 replication.

48

## 49 **INTRODUCTION**

50 Cellular organelles are membrane-bound compartments that are critical for eukaryotic  
51 cell function and RNA viruses often co-opt organelles to promote virus replication. Organelles  
52 exploited by RNA viruses include the endoplasmic reticulum (ER) [1], mitochondria [2], nucleus  
53 [3], and Golgi apparatus [4]. Recently, much attention has been directed towards membraneless  
54 organelles that form through protein phase separation. Phase separation transforms a single-  
55 phase solution into a dilute phase and droplet phase that concentrates biomolecules, such as  
56 proteins or RNAs [5, 6]. Some cellular proteins phase separate and form aggregates that are  
57 associated with several neurodegenerative disorders [7]. Proteins that undergo phase  
58 separation consistently contain intrinsically disordered regions (IDRs) that self-associate to form  
59 oligomers [8]. Many IDR-containing proteins have RNA-recognition motifs that non-specifically  
60 bind RNA and fine-tune phase separation by controlling material exchange, shape, and rigidity  
61 of liquid droplets [8, 9]. Proteins that phase separate are often enriched in arginine residues that  
62 can participate in cation- $\pi$  interactions with aromatic contacts and promote phase separation  
63 [10].

64 Membraneless organelles exist as liquids, gels, or solids, [11]. The most notable  
65 examples of liquid-liquid phase separated (LLPS) membraneless compartments are the  
66 nucleolus and P-bodies in the cytoplasm [12]. Less dynamic stress granules (SGs) also form in  
67 the cytoplasm through phase separation and allow host cells to repress translation and  
68 influence messenger RNA (mRNA) stability in response to various stresses [13]. SGs are visible  
69 by microscopy within minutes following stress and contain Ras-GTPase-activating protein SH3  
70 domain-binding protein 1 (G3BP1) that self-associates to induce SG formation [14]. SGs contain  
71 a stable inner core and an outer shell that is formed by weak electrostatic and/or hydrophobic  
72 interactions [15]. The G3BP1 inner core is resistant to dilution (atypical for LLPS) and has been  
73 considered to be a form of liquid-solid demixing [16]. Interestingly, G3BP1 can have either  
74 proviral [17-19] and antiviral roles [20-22] in RNA virus lifecycles.

75 Members of the *Mononegavirales*, including *Rabies virus*, *Measles virus* (MeV), and  
76 *Vesicular stomatitis virus* generate phase-separated cytoplasmic inclusion bodies that create  
77 viral factories [23-25]. Phase separation of MeV N and P proteins also promotes efficient  
78 encapsidation of viral RNAs [25]. Several groups have recently demonstrated that the  
79 nucleocapsid (N) protein from the novel SARS-CoV-2 coronavirus undergoes LLPS [26]. SARS-  
80 CoV-2 N protein phase separation is stimulated by the 5' end of its cognate RNA [27] and can  
81 partition into phase separations of heterogeneous nuclear ribonucleoproteins like TDP-43, FUS,  
82 and hnRNPA2 [28]. The SARS-CoV-2 N protein also interacts with G3BP1 and can attenuate  
83 SG formation [29, 30].

84 *Pea enation mosaic virus 2* (PEMV2) is a small (4,252 nt), positive-sense RNA plant  
85 virus in the tombusvirus family. The PEMV2 long-distance movement protein (MP) p26 is  
86 required for systemic trafficking of viral RNA throughout an infected plant. Both p26 and the  
87 orthologue pORF3 from *Groundnut rosette virus* (GRV) primarily localize to the cytoplasm, but  
88 also target cajal bodies in the nucleus and eventually partition in the nucleolus [31-33].  
89 Umbravirus ORF3 proteins must interact with nucleolar fibrillarin (Fib2), a pre-requisite for long-

90 distance movement of viral RNA [33-35]. Additionally, the polerovirus *Potato leafroll virus*  
91 (PLRV) and the potexvirus *Bamboo mosaic virus* satellite RNA (satBaMV) encode proteins that  
92 must also localize to the nucleolus and interact with fibrillarin to support systemic movement  
93 [36-38]. Fibrillarin phase separates and forms the dense fibrillar component (DFC) of the  
94 nucleolus that shares a similar structure to SGs [15, 39]. Although the nucleolus itself is a phase  
95 separation and several plant virus proteins co-localize with fibrillarin, the role of viral protein  
96 phase separation in plant virus lifecycles has not been investigated.

97         This study demonstrates that PEMV2 p26 undergoes phase separation both *in vitro* and  
98 *in vivo* and forms highly viscous condensates. Viral ribonucleoprotein (vRNP) complexes  
99 containing p26, Fib2, and PEMV2 RNA were reconstituted *in vitro* through phase separation and  
100 likely represents the version of the *in vivo* event necessary for systemic trafficking. Mutating  
101 charged residues required for phase separation and proper nucleolar localization blocked the  
102 movement of a viral vector suggesting that phase separation and virus movement are  
103 intertwined. Finally, p26 phase separates *in vivo* with the SG nucleator, G3BP, which exhibits  
104 strong antiviral activity towards PEMV2. PEMV2 accumulation was largely restored during  
105 expression of a phase-separation deficient G3BP, demonstrating that phase separation of select  
106 cellular proteins aids host antiviral responses.

107

## 108 **RESULTS**

109         

**p26 forms poorly dynamic condensates *in vivo*.** p26 and related umbravirus  
110 orthologues form large cytoplasmic inclusion bodies during infection [35, 40, 41]. To define the  
111 material properties of p26 inclusion bodies *in vivo*, we used fluorescence recovery after  
112 photobleaching (FRAP) [42]. p26 with a C-terminal green fluorescent protein (GFP) tag was  
113 expressed from a *Cauliflower mosaic virus* (CaMV) 35S promoter in *Nicotiana benthamiana* by  
114 agroinfiltration (Fig. 1A). Separately, free GFP was expressed from a 35S promoter and was  
115 evenly distributed throughout the cytoplasm and nucleus of the cell (i.e., outside of the large

116 vacuole that comprises most of the cellular space) (Fig. 1B, Left). In contrast, p26:GFP formed  
117 large cytoplasmic inclusion bodies as previously observed (Fig. 1B, Right) [41]. Nearly 50%  
118 recovery of p26:GFP was observed by 30 seconds post-bleach (Fig. 1C) demonstrating that p26  
119 inclusion bodies have measurable fluidity. However, p26:GFP failed to recover any further  
120 suggesting that p26 forms poorly dynamic condensates *in vivo*, similar to what has been  
121 observed for G3BP1 SG cores [16].

122 **p26 is intrinsically disordered and undergoes phase separation.** To support the *in*  
123 *vivo* FRAP observations suggesting that p26 undergoes phase separation, *in vitro* assays were  
124 performed. Using the IUPred disorder prediction model [43], a large IDR spanning amino acids  
125 1-132 was predicted in p26 (Fig. 2A). For comparison, the non-essential PEMV2 cell-to-cell  
126 movement protein, p27, did not contain a predicted IDR (Fig. 2A). Glycine, proline, and arginine  
127 amino acids are the most abundant residues in the p26 IDR (Fig. 2B), consistent with  
128 disordered proteins known to phase separate [44]. The p26 IDR was fused to the N-terminus of  
129 GFP and purified from *E. coli* for *in vitro* phase separation assays (Fig. 2C). 10% PEG-8000  
130 was used to mimic cellular crowding and IDR-GFP readily phase separated under crowding  
131 conditions as observed by both turbidity assays (Fig. 2D) and confocal microscopy (Fig. 2E). In  
132 contrast, free GFP failed to phase separate under all tested conditions. High-salt concentrations  
133 disrupt self-associations resulting from electrostatic interactions and can reverse phase  
134 separation [45]. Accordingly, IDR-GFP concentrations near the saturation concentration ( $C_{sat} = 4$   
135  $\mu\text{M}$ ) failed to phase separate in the presence 800 mM NaCl and 1 M NaCl was required to block  
136 phase separation under standard assay conditions using 8  $\mu\text{M}$  protein (Fig. 2E and F). IDR-GFP  
137 phase separations were next treated with 10% 1,6 hexanediol to probe the material properties  
138 of the *in vitro* condensates. 1,6 hexanediol interferes with weak hydrophobic protein-protein  
139 interactions and dissolves liquid-like, but not solid or highly viscous phase separations [46]. IDR-  
140 GFP phase separations were resistant to 1,6 hexanediol treatment (Fig. 2E) and FRAP  
141 analyses revealed that IDR-GFP condensates only reached 13% recovery after 2 minutes

142 following photo-bleaching (Fig. 2J). Together, these data suggest that the p26 IDR drives phase  
143 separation through electrostatic interactions and the resulting condensates are highly viscous.

144 **Charged residues are critical for efficient p26 IDR phase separation.** To determine if  
145 specific groups of amino acids contribute to p26 phase separation, a series of IDR-GFP mutants  
146 were purified (Fig. 2C) and tested. First, all basic or acidic residues were mutated to glycine  
147 (R/K-G or D/E-G, respectively). Since high-salt blocks IDR-GFP phase separation, simultaneous  
148 mutation of either basic or acidic residues was predicted to inhibit phase separation. Indeed,  
149 R/K-G failed to phase separate while D/E-G showed significantly reduced phase separation  
150 compared to IDR-GFP when examined by confocal microscopy (Fig. 2G), turbidity assays (Fig.  
151 2H), or mean condensate size (Fig. 2I). At elevated concentrations (24  $\mu$ M), R/K-G formed non-  
152 uniform aggregates and failed to recover in FRAP assays (Fig. 2J). However, D/E-G  
153 condensates displayed significantly elevated fluidity when compared to IDR-GFP with 35%  
154 recovery after 2 minutes (Fig. 2J) and may be due to increased glycine content that has been  
155 associated with increasing condensate fluidity [47]. Cation- $\pi$  interactions between arginines and  
156 aromatic rings promote phase separation and are useful for predicting the propensity of a  
157 protein to phase separate [10, 48]. However, the p26 IDR only contains three aromatic residues  
158 that could potentially facilitate cation- $\pi$  interactions and mutation of all arginines to lysine (R-K)  
159 had no effect on phase separation, condensate size, or FRAP recovery (Fig. 2G-J). Finally,  
160 hydrophobic IDR residues (V, L, I, M, F, Y, W) were mutated to polar serine residues to reduce  
161 the hydrophobicity and prevent hydrophobic interactions that can drive phase separation [49].  
162 Again, VLIMFYW-S phase separated like wild-type and was sensitive to high-salt (Fig. 2G).  
163 However, VLIMFYW-S condensates failed to recover in FRAP assays (Fig. 2J). These results  
164 suggest that hydrophobic residues contribute to the limited fluidity of p26 phase separations or  
165 rather the observed decrease in fluidity is due to the hardening properties of introduced serine  
166 residues [47].

167           **p26 partitions in the nucleolus and forms assemblies with the fibrillar GAR**  
168   **domain via phase separation.** Umbravirus movement proteins must access the nucleolus to  
169   support systemic virus trafficking [33]. Here, the nucleolar partitioning of wild-type or mutant  
170   p26:GFP was examined after agroinfiltration of *N. benthamiana* leaves. As previously reported  
171   for related orthologues [33-35, 50], p26 was observed in the nucleolus and cajal bodies in  
172   addition to forming cytoplasmic granules (Fig. 3A, Left). However, R/K-G p26 was diffusely  
173   expressed throughout the cytoplasm and failed to partition in the nucleolus (Fig. 3A, Middle).  
174   Conserved arginines in the related GRV pORF3 were previously shown to constitute a nuclear  
175   localization signal (NLS) [50]. Therefore, both p26 nuclear localization and phase separation are  
176   controlled by arginine residues and based on our mutagenesis studies it is unlikely that phase  
177   separation can be abolished without disrupting the NLS. Despite having markedly reduced  
178   phase separation *in vitro*, D/E-G p26 localized to the nucleolus and formed cytoplasmic  
179   granules that appeared like wild-type (Fig. 3A, Right). However, D/E-G had increased nucleolar  
180   retention compared to wild-type p26 as determined using the Manders Overlap Coefficient  
181   (MOC) to measure the degree of spatial overlap between D/E-G and DAPI-stained nuclei (Fig.  
182   3B). Nucleolar localization/retention of *Arabidopsis thaliana* ribosomal proteins is dependent on  
183   the overall positive (basic) charge of the protein [51] and could explain the increased retention  
184   of D/E-G since the net charge of D/E-G at pH 7.4 is +36 compared to +14 for wild-type p26.  
185   Similarly, nucleolar accumulation of the *Human immunodeficiency virus 1* Tat protein strongly  
186   correlates with the overall net charge [52]. Together, these data demonstrate that basic residues  
187   are required for p26 nucleolar partitioning and the overall net charge influences nucleolar  
188   trafficking.

189           Fibrillar (Fib2) is a known host factor required for systemic trafficking of umbravirus  
190   vRNPs [31, 32] and makes up the dense fibrillar component of the nucleolus [53]. The *A.*  
191   *thaliana* Fib2 N-terminus contains an intrinsically disordered glycine- and arginine-rich (GAR)  
192   domain (Fig. 3C) that is common to fibrillar across eukaryotes [54]. To determine whether the



193 GAR domain of *A. thaliana* Fib2 is sufficient for phase separation, the GAR domain (amino  
194 acids 7-77, Fib2<sub>GAR</sub>) was fused to the N-terminus of mCherry and purified from *E. coli* for *in vitro*  
195 phase separation assays (Fig. 3D). Full-length Fib2 was also fused to mCherry (Fib2<sub>FL</sub>) for  
196 comparison. Free mCherry did not phase separate in the presence of 10% PEG-8000 or under  
197 high-salt conditions (Fig. 3E). Fib2<sub>GAR</sub> readily phase separated under crowding conditions but  
198 was unable to phase separate in the presence of 1 M NaCl (Fig. 3E). These results indicate that  
199 the GAR domain is sufficient to drive Fib2 phase separation through electrostatic interactions  
200 and is consistent with findings using mammalian or *Caenorhabditis elegans* fibrillarin [39, 55,  
201 56]. Full-length Fib2 phase separated under crowding conditions but unlike Fib2<sub>GAR</sub>, Fib2<sub>FL</sub> was  
202 resistant to 1 M NaCl (Fig. 3E). These results suggest that Fib2<sub>FL</sub> condensates are not strictly  
203 dependent on electrostatic interactions or Fib2<sub>FL</sub> forms aggregates that are resistant to high salt.  
204 Indeed, Fib2<sub>FL</sub> condensates failed to recover in FRAP assays while Fib2<sub>GAR</sub> droplets were poorly  
205 dynamic but recovered nearly 20% after two minutes (Fig. 3F). Earlier work has determined that  
206 the GAR domain increases the solid-like properties of fibrillarin condensates [55] and supports  
207 our observations that both Fib2<sub>GAR</sub> and Fib2<sub>FL</sub> are poorly dynamic.

208 **vRNPs required for systemic trafficking can be reconstituted *in vitro* via phase**  
209 **separation.** Fib2 is a necessary component of umbravirus vRNPs that move systemically  
210 during infection. To determine whether full-length PEMV2 RNA could be sorted to Fib2 phase  
211 separations, Cy5-labelled PEMV2 RNA was mixed with pre-formed Fib2<sub>GAR</sub> or Fib2<sub>FL</sub> droplets at  
212 a 500:1 protein:RNA molar ratio. PEMV2-Cy5 RNA was not efficiently sorted into Fib2<sub>GAR</sub>  
213 droplets (Fig. 3G) and is consistent with earlier findings that determined the GAR domain does  
214 not bind RNA [54, 55]. However, Fib2<sub>FL</sub> efficiently captured PEMV2-Cy5 RNAs demonstrating  
215 that viral RNAs can partition with Fib2 phase separations (Fig. 3G). Since p26 must also bind  
216 PEMV2 RNA prior to trafficking, PEMV2-Cy5 RNA was mixed with pre-formed IDR-GFP  
217 droplets. Approximately 50% of IDR-GFP signal spatially overlapped PEMV2-Cy5 signal when  
218 visualized by confocal microscopy and quantified by MOC (Fig. 3H and I). Interestingly,

219 partitioning of viral RNA inside IDR-GFP condensates was not unique to PEMV2 RNA since the  
220 distantly related *Turnip crinkle virus* (TCV) RNA was sorted to IDR-GFP phase separations with  
221 similar propensity as measured by MOC (Fig. 3H and I). Collectively, these results demonstrate  
222 that both cognate and non-cognate viral RNAs are readily sorted into p26 phase separations.

223 Since the related GRV pORF3 directly interacts with the Fib2 GAR domain [34], IDR-  
224 GFP was added to pre-formed Fib2<sub>GAR</sub> droplets at a 1:6 molar ratio to determine whether p26  
225 can partition into phase separated Fib2 condensates. Expectedly, IDR-GFP was readily sorted  
226 into pre-formed Fib2<sub>GAR</sub> droplets *in vitro* (Fig. 3J, Left) and is likely the reconstituted version of  
227 the p26-Fib2 interaction required for Fib2 export from the nucleus and subsequent vRNA  
228 association. To determine whether phase separation of p26 supports Fib2 partitioning, the  
229 phase separation-deficient R/K-G mutant was added to pre-formed Fib2<sub>GAR</sub> droplets.  
230 Interestingly, R/K-G remained in the bulk phase and was excluded from Fib2<sub>GAR</sub> droplets (Fig.  
231 3J, Right, White arrows) suggesting that the ability of p26 to phase separate supports the key  
232 interaction with Fib2 required for virus movement. Finally, Fib2<sub>FL</sub> and IDR-GFP phase  
233 separation was induced by molecular crowding prior to the addition of PEMV2-Cy5 RNA.  
234 Droplets containing IDR-GFP, Fib2<sub>FL</sub>, and PEMV2 RNA were observed (Fig. 3K) and  
235 demonstrate that the critical p26-Fib2-RNA interaction necessary for systemic trafficking of  
236 PEMV2 RNAs can be reconstituted using *in vitro* phase separation assays. In summary, these  
237 findings support a role for p26 phase separation in supporting virus movement.

### 238 **Phase separation-deficient p26 mutants fail to systemically traffic a virus vector.**

239 To determine whether phase separation-deficient p26 mutants could support virus trafficking, a  
240 *Tobacco mosaic virus* vector was used to express free GFP, p26, R/K-G, or D/E-G GFP fusions  
241 (Fig. 4A). The TMV vector (pJL-TRBO) contains a coat protein (CP) deletion that has been  
242 previously reported to block systemic movement [57]. Interestingly, GRV pORF3 and PEMV2  
243 p26 have been previously shown to systemically traffic TMV when expressed from a  
244 subgenomic promoter in place of CP [41, 58]. Local infections were established in young *N.*

245 *benthamiana* plants (4<sup>th</sup> leaf stage) and high levels of free GFP and lower levels of p26:GFP,  
246 R/K-G, and D/E-G were observed at 4 days post-infiltration (dpi) (Fig. 4B). Systemic trafficking  
247 of TMV:p26:GFP was readily apparent by 14 dpi by both visual inspection of leaves and RT-  
248 PCR (Fig. 4C). However, TMV expressing GFP, R/K-G, or D/E-G GFP fusions failed to move  
249 systemically at 14 dpi. Basic amino acids are known to function as a NLS for GRV pORF3 [50]  
250 and are also required for partitioning in pre-formed Fib2 droplets (Fig. 3J). Therefore, p26  
251 nucleolar localization and phase separation are co-dependent on basic residues and the R/K-G  
252 mutation presumably blocks interactions with Fib2 and subsequent virus trafficking. Failure of  
253 D/E-G to support virus movement was surprising since D/E-G retained the ability to phase  
254 separate (albeit less efficiently) and localize to the nucleolus (Figs. 2G and 3A). However,  
255 increased nucleolar retention of D/E-G could contribute to the block in systemic movement and  
256 suggests that nucleolar and virus trafficking by p26 is a tightly regulated process. Together,  
257 these data suggest that p26 phase separation, nucleolar partitioning, and virus movement are  
258 connected and co-dependent on charged residues. The TMV CP deletion has been previously  
259 reported to block systemic movement of the TRBO vector [57], but we routinely observed  
260 systemic trafficking of pJL-GFP after 3 weeks (Supplemental Fig. 1). However, pJL-GFP was  
261 largely restricted to the petiole and midrib of systemic leaves whereas pJL-p26:GFP spread  
262 throughout the veins and invaded the lamina. Weak D/E-G GFP expression was observed in the  
263 petioles and midribs of upper leaves at 21 dpi while R/K-G GFP was not visible (Supplemental  
264 Fig. 1).

265 **p26 is sorted into G3BP phase separations that restrict PEMV2 accumulation.** Our  
266 findings suggest that p26 phase separations share similar material properties to G3BP SG  
267 cores, mostly consistent with liquid-solid demixing [16]. A NTF2-RRM domain-containing protein  
268 from *A. thaliana* (AtG3BP) functions as a G3BP-like SG nucleator in plants [59]. The N-terminal  
269 NTF2 domain is required for both phase separation and recruitment to SGs [60, 61] and G3BP  
270 contains downstream IDRs (Fig. 5A). As previously demonstrated by Krapp et. al. [59],

271 G3BP:RFP displays a diffuse cytoplasmic expression pattern under no stress, but forms  
272 cytoplasmic SGs after heat shock (Fig. 5B). As expected,  $\Delta$ NTF2-G3BP failed to phase  
273 separate and form SGs following heat shock (Fig. 5B). When co-expressed with p26:GFP,  
274 recruitment of p26 to G3BP SGs was observed following heat shock (Fig. 5B). To determine if  
275 p26 partitions into SGs during a viral infection, G3BP:RFP was expressed in *N. benthamiana*  
276 plants systemically infected with TMV expressing p26:GFP (Fig. 5C). p26:GFP condensates co-  
277 localized with G3BP:RFP demonstrating that p26 and G3BP can share phase separations  
278 during an infection (Fig. 5C). To determine if G3BP expression is up- or down-regulated during  
279 PEMV2 infection, native G3BP gene expression was measured by RT-qPCR at 3 dpi in PEMV2-  
280 infected *N. benthamiana* (Fig. 5D). PEMV2 infection led to a 61% increase in G3BP expression  
281 (Fig. 5D) in accordance with previous RNA-seq analyses that showed a 2-fold increase in G3BP  
282 expression under similar conditions [41]. To determine if G3BP exerts a pro- or anti-viral effect  
283 on PEMV2 accumulation, G3BP:RFP was over-expressed alongside PEMV2. PEMV2  
284 accumulation was reduced >20-fold during G3BP over-expression demonstrating that G3BP  
285 exerts strong antiviral activity towards PEMV2 (Fig. 5E). Virus accumulation was largely  
286 restored (only 5-fold inhibition) during overexpression of  $\Delta$ NTF2-G3BP demonstrating that  
287 phase separation of G3BP is required for maximal antiviral activity (Fig. 5E). Together, these  
288 data demonstrate that p26 partitions inside G3BP SGs and G3BP phase separation facilitates  
289 an antiviral virus-host interaction.

290

## 291 **DISCUSSION**

292 Phase separation of viral proteins has largely been associated with negative-sense RNA  
293 virus proteins that undergo phase separation to form virus factories [25], including Negri bodies  
294 during Rabies virus infections [23, 62, 63]. Also, measles virus N and P proteins encapsidate  
295 viral RNA more efficiently in a phase-separated droplet compared to a single phase solution  
296 [64]. In contrast, many positive-strand RNA viruses, including members of the *Tombusviridae*

297 family form membranous replication organelles to concentrate virus replication complexes [65,  
298 66]. While specific roles for phase separation of positive-sense RNA virus proteins in the virus  
299 lifecycle remain limited, phase separation of the SARS-CoV-2 N protein has been suggested to  
300 mediate nucleocapsid assembly and genome processing [67].

301 This study demonstrates that the p26 movement protein from the positive-sense RNA  
302 plant virus PEMV2 phase separates to form poorly dynamic condensates. Electrostatic  
303 interactions between acidic and basic IDR residues drive p26 phase separation and mutation of  
304 basic residues (R/K-G) abolished phase separation. Surprisingly, mutation of acidic residues  
305 (D/E-G) did not abolish phase separation but was significantly reduced compared to wild-type *in*  
306 *vitro*. Previous studies have found that phase separation of arginine-rich peptides can occur  
307 through charge repulsion in the presence of buffer counteranions and could support D/E-G  
308 phase separation [68, 69].

309 p26 must interact with fibrillarin (Fib2) in phase-separated nucleoli to support systemic  
310 virus trafficking [34], and conserved arginine residues have been shown to function as a NLS for  
311 the related GRV pORF3 [50]. Our results demonstrated that p26 nuclear localization and phase  
312 separation are both governed by basic amino acids making it problematic to separate these  
313 phenomena. However, the R/K-G IDR failed to accumulate in pre-formed Fib2<sub>GAR</sub> droplets *in*  
314 *vitro* suggesting that phase separation of p26 could be required to partition in Fib2 phase  
315 separations and the nucleolus. Unsurprisingly, R/K-G p26 failed to support systemic movement  
316 of a TMV vector demonstrating that nucleolar partitioning, and potentially phase separation is  
317 required for virus movement. Mutation of acidic residues (D/E-G) significantly increased  
318 nucleolar retention of p26 and could be the result of increased protein net charge that is known  
319 to correlate with increased nucleolar retention [52]. Interestingly, D/E-G p26 failed to  
320 systemically traffic a TMV vector suggesting that the interplay between p26 nucleolar  
321 localization and virus movement is tightly regulated. In summary, charged amino acids play a  
322 critical role in p26 phase separation, nucleolar partitioning, and systemic virus movement.

323           Stress granules can support or restrict RNA virus replication and are assembled by the  
324 self-association and phase separation of G3BP [60, 61]. Seven *A. thaliana* G3BP-like  
325 candidates have been identified [70] and share an N-terminal NTF2 domain that is required for  
326 phase separation of mammalian G3BP1 [61]. In this study, the previously characterized  
327 AtG3BP-2 (AT5G43960) [59] was used to determine whether p26 could partition in G3BP stress  
328 granules. After heat shock, p26 readily partitioned inside G3BP SGs and both p26 and G3BP  
329 co-localized during virus infection. G3BP expression was upregulated during PEMV2 infection  
330 suggesting that G3BP could be expressed as part of a concerted host response to infection.  
331 G3BP over-expression severely restricted PEMV2 infection but was partially restored during  
332 expression of  $\Delta$ NTF2-G3BP, demonstrating that phase separation of G3BP is necessary for  
333 maximum antiviral activity.

334           Since PEMV2 accumulation was not fully restored during  $\Delta$ NTF2-G3BP expression,  
335 G3BP retains measurable antiviral activity in the dilute state. Human G3BP1 has been shown to  
336 bind and promote the degradation of mRNAs with structured 3' untranslated regions (3' UTRs)  
337 in conjunction with upframeshift 1 (Upf1) as part of the structure-mediated RNA decay (SRD)  
338 pathway [71]. PEMV2 contains a highly structured 3' UTR [72] and like many RNA viruses is  
339 inhibited by Upf1 [73, 74]. Therefore, G3BP over-expression could enhance SRD targeting of  
340 PEMV2 RNAs. It remains unclear if p26 partitioning into G3BP SGs is beneficial or detrimental  
341 for PEMV2 replication. However, p26 was previously shown to disrupt the Upf1-dependent  
342 nonsense-mediated decay (NMD) pathway [41] and Upf1 is known to localize to G3BP1 SGs  
343 [75]. Partitioning of p26 into G3BP SGs could potentially interfere with Upf1- or G3BP-  
344 dependent RNA decay pathways.

345           In summary, our findings demonstrate that a plant virus movement protein phase  
346 separates and partitions inside cellular phase separations, namely the nucleolus and stress  
347 granules. Since nucleolar partitioning is required for virus trafficking and G3BP SG formation

348 severely restricts PEMV2 replication, our findings highlight both beneficial and detrimental virus-  
349 host interactions mediated by phase separation.

350

## 351 **ACKNOWLEDGEMENTS**

352 We would like to thank Dr. Björn Krenz (Leibniz Institut DSMZ, Brunswick, Germany) for  
353 the generous gifts of the G3BP:RFP construct. We would also like to thank Dr. Jonathan  
354 Dinman and Dr. Anne Simon (University of Maryland) for their thoughtful insight. We would also  
355 like to thank Dr. Anne Simon for critically reading this manuscript.

356

## 357 **AUTHOR CONTRIBUTIONS**

358 Conceptualization, J.P.M; Methodology, S.B. and J.P.M; Investigation, S.B. and J.P.M; Writing –  
359 Original Draft, J.P.M.; Writing – Review & Editing, S.B. and J.P.M; Supervision, J.P.M.

360

## 361 **COMPETING INTERESTS**

362 The authors declare no competing interests.

363

## 364 **MATERIALS & METHODS**

365 *Construction of expression vectors.* For C-terminal GFP fusion recombinant protein  
366 production in *E. coli*, pRSET his-eGFP [76] was used as a backbone and was a gift from Jeanne  
367 Stachowiak (Addgene plasmid # 113551). Wild-type IDR was PCR amplified from a full-length  
368 PEMV2 infectious clone, whereas R-K, VLIMFYW-S, R/K-G, and D/E-G were synthesized  
369 (Integrated DNA Technologies) as double stranded DNA fragments before used in restriction  
370 digests and ligation. All fragments except for R/K-G and D/E-G were cloned into the *BamHI*  
371 restriction site and sequenced for directionality and accuracy. R/K-G and D/E-G were cloned  
372 into pRSET his-eGFP using both the *NheI* and *BamHI* restriction sites and sequenced for  
373 accuracy.

374 Fibrillarin (Fib2) was first amplified from cDNA synthesized from *Arabidopsis thaliana*  
375 seedling total RNA using primers Forward 5'-  
376 GCAGCAGCTAGCATGAGACCTCCTCTAACTGGAAGTGG-3' and Reverse 5'-  
377 CTGCTGCGGATCCAGCAGCAGTAGCAGCCTTTGGCTTC-3' where the underlined  
378 sequences denote the *NheI* and *BamHI* restriction sites used to introduce the PCR fragment  
379 into pRSET-his-mCherry [77], a gift from Jeanne Stachowiak (Addgene plasmid # 113552). The  
380 resulting construct is full-length Fib2 with a C-terminal mCherry fusion (Fib2<sub>FL</sub>). The Fib2 GAR  
381 domain was PCR amplified from Fib2<sub>FL</sub>, digested, and ligated into the *NheI* and *BamHI*  
382 restriction sites of pRSET-his-mCherry to generate Fib2<sub>GAR</sub>.

383 The *Tobacco mosaic virus* (TMV) expression vector pJL-TRBO has been previously  
384 described [57] and was a gift from John Lindbo (Addgene plasmid # 80082). The TMV vector  
385 containing p26:GFP has also been previously described [41]. R/K-G and D/E-G GFP-fusion  
386 inserts were commercially synthesized (Integrated DNA Technologies). TMV vectors expressing  
387 free GFP, R/K-G or D/E-G GFP fusions were constructed by cloning respective PCR fragments  
388 into the *PacI* and *NotI* restriction sites in pJL-TRBO. p26:GFP, R/K-G, and D/E-G GFP fusions  
389 were also PCR amplified and cloned into pBIN61 using *BamHI* and *Sall* restriction sites to  
390 transiently express p26-fusions downstream of the constitutive *Cauliflower mosaic virus* (CaMV)  
391 35S promoter. G3BP:RFP was a generous gift from Dr. Björn Krenz and has been previously  
392 described [59]. To construct  $\Delta$ NTF2-G3BP:RFP, G3BP-RFP was PCR amplified with amino  
393 acids 2-125 of G3BP omitted. PCR amplification introduced forward *BamHI* and reverse *Sall*  
394 restriction sites for cloning into pBIN61S. All DNA constructs used in this study were sequenced  
395 for accuracy.

396 *Fluorescence recovery after photobleaching (FRAP)*. A ~2  $\mu$ m diameter region was  
397 photobleached with 100% laser power with subsequent recovery measured at 5 s intervals.  
398 Background regions and unbleached reference condensates were recorded as controls. FRAP



399 was performed using a Zeiss LSM 510 Meta confocal microscope with a 20X objective and Zen  
400 2009 software. Data analysis was performed as previously described [78]. Briefly, background  
401 intensity was subtracted, intensities were normalized to set the first post-bleach value to zero  
402 and presented as a fraction of the pre-bleach fluorescence intensity.

403 *Protein expression and purification.* Histidine-tagged recombinant proteins were  
404 expressed in BL21(DE3) *E. coli* (New England BioLabs) using autoinduction Luria-Bertani (LB)  
405 broth and purified using HisPur cobalt spin columns (Thermo Scientific). Proteins were purified  
406 under denaturing conditions according to the manufacturer's protocol using 8 M urea. All  
407 equilibration, wash, and elution buffers contained 1 M NaCl to disrupt electrostatic interactions  
408 and restrict phase separation. Following elution of recombinant proteins from the cobalt resin,  
409 proteins were re-folded through dialysis in buffer containing 10 mM Tris-HCl (pH 7.0), 300 mM  
410 NaCl, 1 mM EDTA, 1 mM dithiothreitol, and 10% glycerol as previously done for the related  
411 pORF3 from *Groundnut rosette virus* [40]. Urea was removed in a stepwise fashion by using  
412 dialysis buffers containing 4 M Urea, 1 M Urea, or no Urea. Proteins were concentrated using  
413 centrifugal filters and concentrations were measured using the Bicinchoninic acid (BCA) protein  
414 assay kit (Millipore Sigma). Proteins were aliquoted and stored at -80°C.

415 *Phase separation assays.* GFP- or mCherry-tagged proteins were used at a final  
416 concentration of 8  $\mu$ M unless otherwise noted. Phase separation assays consisted of the  
417 following mixture: 8  $\mu$ M protein, 10 mM Tris-HCl (pH 7.0), 1 mM DTT, 100 mM NaCl, and 10%  
418 PEG-8000 to mimic cellular crowding. Phase separation occurred rapidly and samples were  
419 directly loaded onto glass slides for confocal microscopy using a Zeiss LSM 510 Meta confocal  
420 microscope with a 20x objective and appropriate filters. High-salt conditions included NaCl at a  
421 final concentration of 1 M and "no treatment" did not include PEG-8000. Phase separation  
422 assays were performed at least twice across two protein preparations. Turbidity assays  
423 comparing IDR-GFP and D/E-G were performed with either 8  $\mu$ M or 24  $\mu$ M protein under  
424 standard assay conditions. 100  $\mu$ L reactions were placed at room temperature for 15 minutes

425 prior to measuring OD<sub>600</sub> using a 96-well plate reader. Cy5-labelled PEMV2 or TCV RNA was  
426 synthesized by T7 run-off transcription using *Sma*I-linearized full-length infectious clones. Cy5-  
427 UTP (APExBIO) was added to *in vitro* transcription reactions according to the HiScribe T7 Quick  
428 High Yield RNA Synthesis Kit protocol (New England Biolabs). RNAs were included in phase  
429 separation assays at a final concentration of 16 nM (500:1 protein:RNA ratio).

430 *Agroinfiltration*. Expression constructs were electroporated into *Agrobacterium*  
431 *tumefaciens* (C58C1 strain). Liquid cultures were passaged in media containing 20 µM  
432 acetosyringone 1 day prior to infiltration. Overnight cultures were pelleted and resuspended in  
433 10 mM MgCl<sub>2</sub>, 10 mM MES-K [pH 5.6], and 100 µM acetosyringone. Infiltration mixtures  
434 contained the p14 RNA silencing suppressor from *Pothos latent virus* [79] at a final OD<sub>600</sub> of 0.2.  
435 pBIN-GFP constructs, TMV vectors, and G3BP:RFP constructs were infiltrated at a final OD<sub>600</sub>  
436 of 0.4. The full-length PEMV2 expression construct has been previously described [73] and was  
437 agroinfiltrated at a final OD<sub>600</sub> of 0.4. Visualization of nuclei in p26:GFP, R/K-G, or D/E-G-  
438 expressing plants was achieved by infiltrating a solution of 5 µg/mL DAPI (4',6-diamidino-2-  
439 phenylindole) into leaves 45 minutes prior to imaging. Heat shock of G3BP-expressing plants  
440 was performed by placing plants at 37°C for 45 minutes prior to imaging. To visualize  
441 G3BP:RFP alongside p26:GFP during virus infection, young *N. benthamiana* plants (3-4 leaf  
442 stage) were first infiltrated with TMV:p26:GFP. After strong p26:GFP signal was observed in the  
443 systemic leaves (typically ~2-3 weeks), G3BP:RFP was agroinfiltrated and imaged at 5 dpi  
444 using a Zeiss LSM 510 Meta confocal microscope with a 20x objective. Plants were grown in a  
445 humidity-controlled chamber at 24°C, 65% humidity, and 12-hour day/night schedule (200 µmol  
446 m<sup>-2</sup>s<sup>-1</sup>).

447 *TMV movement assay and RT-PCR*. pJL-TRBO derived TMV vectors expressing GFP  
448 or p26-GFP fusions were agroinfiltrated into young *N. benthamiana* plants (3-4 true leaf stage).  
449 GFP fluorescence in local and systemic leaves was monitored daily. At 4 dpi, robust local  
450 infections were evident, and leaves were harvested by grinding in liquid nitrogen. Total protein

451 was extracted by resuspending leaf tissue in 1X PBS supplemented with 3%  $\beta$ -mercaptoethanol  
452 and protease inhibitor cocktail (Thermo Scientific). Samples were mixed with 6X Laemmli SDS  
453 buffer, boiled, and separated by SDS-PAGE. A semi-dry transfer method was used to transfer  
454 proteins to nitrocellulose for western blotting using anti-GFP antibodies (Life technologies) at a  
455 1:5000 dilution. Anti-rabbit IgG conjugated with horseradish peroxidase was used as a  
456 secondary antibody again at 1:5000 dilution. Blots were visualized using the Pierce enhanced  
457 chemiluminescence kit (Thermo Scientific). Systemic leaves were harvested at 14 dpi for total  
458 RNA extraction using Trizol. 100 ng total RNA digested with RQ1 DNase (Promega) served as  
459 template for reverse transcription using iScript supermix (Bio Rad). No reverse transcriptase  
460 controls (-RT) were included for all sample and primer sets. 1  $\mu$ L cDNA was used as template  
461 for 25 cycles of PCR using GoTaq polymerase (Promega) targeting the TMV replicase using  
462 forward primer 5' CCGCGAATCTTATGTGGAAT 3' and reverse primer 5'  
463 TCCTCCAAGTGTTCCTCAATC 3'. *N. benthamiana* actin was amplified by 31 cycles of PCR as a  
464 loading control with forward primer 5' TCCTGATGGGCAAGTGATTAC 3' and reverse primer 5'  
465 TTGTATGTGGTCTCGTGGATTC 3'.

466 *RT-qPCR*. Agroinfiltrated "spots" were cut from leaves and stored at -80°C. Samples  
467 were ground in liquid nitrogen and total RNA was extracted using the Quick-RNA Plant Kit  
468 (Zymo Research). An on-column DNase I step was added using RQ1 DNase (Promega). Total  
469 RNAs were used as templates for SYBR green-based one-step reverse-transcriptase  
470 quantitative PCR (RT-qPCR) using the NEB Luna One-Step RT-qPCR kit (New England  
471 Biolabs). All primers were validated by standard curve analysis and had PCR efficiencies  
472 ranging from 90-110%. Native *N. benthamiana* G3BP (Transcript ID:  
473 Niben101Scf03456g00002.1) was targeted using primers Forward 5'  
474 TAGGGGAAGCAATCCAGATG 3' and Reverse 5' TCCTTATCGATCCCAACAGC 3'. PEMV2  
475 genomic RNA was targeted by forward primer 5' TTGCAAGGTTCTAGGCATCC 3' and reverse  
476 primer 5' CAACGATCGAAAAGACGATG 3'. Gene expression was normalized to the internal

477 control transcripts from the agroinfiltrated p14 RNA silencing suppressor using forward primer 5'  
478 TCCCAAACAGGGGTTTTATG 3' and reverse primer 5' GGTAATTGGGAACCCTCGAT 3'.  
479 Expression analyses were performed by the  $\Delta\Delta Cq$  method using Bio-Rad CFX Maestro  
480 software. Target fidelity was monitored by melt curve analyses and no reverse transcriptase  
481 controls.

482

## 483 REFERENCES

- 484 1. Inoue T, Tsai B. How viruses use the endoplasmic reticulum for entry, replication, and  
485 assembly. *Cold Spring Harb Perspect Biol.* 2013;5(1):a013250-a.
- 486 2. Anand SK, Tikoo SK. Viruses as modulators of mitochondrial functions. *Adv Virol.*  
487 2013;2013:738794-.
- 488 3. Walker EJ, Ghildyal R. Editorial: Viral Interactions with the Nucleus. *Front Microbiol.*  
489 2017;8:951-.
- 490 4. Miller S, Krijnse-Locker J. Modification of intracellular membrane structures for virus  
491 replication. *Nature Reviews Microbiology.* 2008;6(5):363-74.
- 492 5. Dolgin E. What lava lamps and vinaigrette can teach us about cell biology. *Nature.*  
493 2018;555(7696):300-2.
- 494 6. Tang L. Liquid phase separation. *Nature Methods.* 2019;16(1):18-.
- 495 7. Elbaum-Garfinkle S. Matter over mind: Liquid phase separation and neurodegeneration.  
496 *The Journal of biological chemistry.* 2019;294(18):7160-8.
- 497 8. Drino A, Schaefer MR. RNAs, Phase Separation, and Membrane-Less Organelles: Are  
498 Post-Transcriptional Modifications Modulating Organelle Dynamics? *BioEssays.*  
499 2018;40(12):1800085.
- 500 9. Zhang H, Elbaum-Garfinkle S, Langdon EM, Taylor N, Occhipinti P, Bridges AA, et al.  
501 RNA Controls PolyQ Protein Phase Transitions. *Mol Cell.* 2015;60(2):220-30.
- 502 10. Vernon RM, Chong PA, Tsang B, Kim TH, Bah A, Farber P, et al. Pi-Pi contacts are an  
503 overlooked protein feature relevant to phase separation. *Elife.* 2018;7:e31486.
- 504 11. Boeynaems S, Alberti S, Fawzi NL, Mittag T, Polymenidou M, Rousseau F, et al. Protein  
505 Phase Separation: A New Phase in Cell Biology. *Trends in cell biology.* 2018;28(6):420-35.
- 506 12. Shorter J. Phase separation of RNA-binding proteins in physiology and disease: An  
507 introduction to the JBC Reviews thematic series. *The Journal of biological chemistry.*  
508 2019;294(18):7113-4.

- 509 13. Riback JA, Katanski CD, Kear-Scott JL, Pilipenko EV, Rojek AE, Sosnick TR, et al.  
510 Stress-Triggered Phase Separation Is an Adaptive, Evolutionarily Tuned Response. *Cell*.  
511 2017;168(6):1028-40.e19.
- 512 14. Matsuki H, Takahashi M, Higuchi M, Makokha GN, Oie M, Fujii M. Both G3BP1 and  
513 G3BP2 contribute to stress granule formation. *Genes to cells : devoted to molecular & cellular*  
514 *mechanisms*. 2013;18(2):135-46.
- 515 15. Jain S, Wheeler JR, Walters RW, Agrawal A, Barsic A, Parker R. ATPase-Modulated  
516 Stress Granules Contain a Diverse Proteome and Substructure. *Cell*. 2016;164(3):487-98.
- 517 16. Wheeler JR, Matheny T, Jain S, Abrisch R, Parker R. Distinct stages in stress granule  
518 assembly and disassembly. *eLife*. 2016;5:e18413.
- 519 17. Cristea IM, Rozjabek H, Molloy KR, Karki S, White LL, Rice CM, et al. Host factors  
520 associated with the Sindbis virus RNA-dependent RNA polymerase: role for G3BP1 and G3BP2  
521 in virus replication. *Journal of virology*. 2010;84(13):6720-32.
- 522 18. Götte B, Panas MD, Hellström K, Liu L, Samreen B, Larsson O, et al. Separate domains  
523 of G3BP promote efficient clustering of alphavirus replication complexes and recruitment of the  
524 translation initiation machinery. *PLoS Pathog*. 2019;15(6):e1007842.
- 525 19. Hosmillo M, Lu J, McAllaster MR, Eaglesham JB, Wang X, Emmott E, et al. Noroviruses  
526 subvert the core stress granule component G3BP1 to promote viral VPg-dependent translation.  
527 *Elife*. 2019;8.
- 528 20. Yang W, Ru Y, Ren J, Bai J, Wei J, Fu S, et al. G3BP1 inhibits RNA virus replication by  
529 positively regulating RIG-I-mediated cellular antiviral response. *Cell death & disease*.  
530 2019;10(12):946.
- 531 21. Pandey K, Zhong S, Diel DG, Hou Y, Wang Q, Nelson E, et al. GTPase-activating  
532 protein-binding protein 1 (G3BP1) plays an antiviral role against porcine epidemic diarrhea  
533 virus. *Veterinary microbiology*. 2019;236:108392.
- 534 22. Reineke LC, Kedersha N, Langereis MA, van Kuppeveld FJ, Lloyd RE. Stress granules  
535 regulate double-stranded RNA-dependent protein kinase activation through a complex  
536 containing G3BP1 and Caprin1. *mBio*. 2015;6(2):e02486.
- 537 23. Nikolic J, Le Bars R, Lama Z, Scrima N, Lagaudrière-Gesbert C, Gaudin Y, et al. Negri  
538 bodies are viral factories with properties of liquid organelles. *Nature communications*.  
539 2017;8(1):58.
- 540 24. Zhou Y, Su JM, Samuel CE, Ma D. Measles Virus Forms Inclusion Bodies with  
541 Properties of Liquid Organelles. *Journal of virology*. 2019;93(21).
- 542 25. Heinrich BS, Maliga Z, Stein DA, Hyman AA, Whelan SPJ. Phase Transitions Drive the  
543 Formation of Vesicular Stomatitis Virus Replication Compartments. *mBio*. 2018;9(5).
- 544 26. Cascarina SM, Ross ED. A proposed role for the SARS-CoV-2 nucleocapsid protein in  
545 the formation and regulation of biomolecular condensates. *FASEB journal : official publication of*  
546 *the Federation of American Societies for Experimental Biology*. 2020.

- 547 27. Iserman C, Roden C, Boerneke M, Sealfon R, McLaughlin G, Jungreis I, et al. Specific  
548 viral RNA drives the SARS CoV-2 nucleocapsid to phase separate. bioRxiv : the preprint server  
549 for biology. 2020.
- 550 28. Perdikari TM, Murthy AC, Ryan VH, Watters S, Naik MT, Fawzi NL. SARS-CoV-2  
551 nucleocapsid protein undergoes liquid-liquid phase separation stimulated by RNA and partitions  
552 into phases of human ribonucleoproteins. bioRxiv : the preprint server for biology. 2020.
- 553 29. Li J, Guo M, Tian X, Wang X, Yang X, Wu P, et al. Virus-Host Interactome and  
554 Proteomic Survey Reveal Potential Virulence Factors Influencing SARS-CoV-2 Pathogenesis.  
555 Med. 2020.
- 556 30. Nabeel-Shah S, Lee H, Ahmed N, Marcon E, Farhangmehr S, Pu S, et al. SARS-CoV-2  
557 Nucleocapsid protein attenuates stress granule formation and alters gene expression via direct  
558 interaction with host mRNAs. bioRxiv. 2020:2020.10.23.342113.
- 559 31. Canetta E, Kim SH, Kalinina NO, Shaw J, Adya AK, Gillespie T, et al. A plant virus  
560 movement protein forms ringlike complexes with the major nucleolar protein, fibrillarin, in vitro. J  
561 Mol Biol. 2008;376(4):932-7.
- 562 32. Kim SH, MacFarlane S, Kalinina NO, Rakitina DV, Ryabov EV, Gillespie T, et al.  
563 Interaction of a plant virus-encoded protein with the major nucleolar protein fibrillarin is required  
564 for systemic virus infection. Proceedings of the National Academy of Sciences.  
565 2007;104(26):11115.
- 566 33. Kim SH, Ryabov EV, Kalinina NO, Rakitina DV, Gillespie T, MacFarlane S, et al. Cajal  
567 bodies and the nucleolus are required for a plant virus systemic infection. The EMBO journal.  
568 2007;26(8):2169-79.
- 569 34. Kim SH, Macfarlane S, Kalinina NO, Rakitina DV, Ryabov EV, Gillespie T, et al.  
570 Interaction of a plant virus-encoded protein with the major nucleolar protein fibrillarin is required  
571 for systemic virus infection. Proc Natl Acad Sci U S A. 2007;104(26):11115-20.
- 572 35. Ryabov EV, Oparka KJ, Santa Cruz S, Robinson DJ, Taliansky ME. Intracellular location  
573 of two groundnut rosette umbravirus proteins delivered by PVX and TMV vectors. Virology.  
574 1998;242(2):303-13.
- 575 36. Kalinina NO, Makarova S, Makhotenko A, Love AJ, Taliansky M. The Multiple Functions  
576 of the Nucleolus in Plant Development, Disease and Stress Responses. Frontiers in plant  
577 science. 2018;9(132).
- 578 37. Haupt S, Stroganova T, Ryabov E, Kim SH, Fraser G, Duncan G, et al. Nucleolar  
579 localization of potato leafroll virus capsid proteins. J Gen Virol. 2005;86(Pt 10):2891-6.
- 580 38. Chang C-H, Hsu F-C, Lee S-C, Lo Y-S, Wang J-D, Shaw J, et al. The Nucleolar  
581 Fibrillarin Protein Is Required for Helper Virus-Independent Long-Distance Trafficking of a  
582 Subviral Satellite RNA in Plants. Plant Cell. 2016;28(10):2586-602.
- 583 39. Feric M, Vaidya N, Harmon TS, Mitrea DM, Zhu L, Richardson TM, et al. Coexisting  
584 Liquid Phases Underlie Nucleolar Subcompartments. Cell. 2016;165(7):1686-97.

- 585 40. Taliansky M, Roberts IM, Kalinina N, Ryabov EV, Raj SK, Robinson DJ, et al. An  
586 umbraviral protein, involved in long-distance RNA movement, binds viral RNA and forms  
587 unique, protective ribonucleoprotein complexes. *Journal of virology*. 2003;77(5):3031-40.
- 588 41. May JP, Johnson PZ, Ilyas M, Gao F, Simon AE. The Multifunctional Long-Distance  
589 Movement Protein of Pea Enation Mosaic Virus 2 Protects Viral and Host Transcripts from  
590 Nonsense-Mediated Decay. *mBio*. 2020;11(2):e00204-20.
- 591 42. Ishikawa-Ankerhold H, Ankerhold, R. and Drummen, G. . Fluorescence Recovery After  
592 Photobleaching (FRAP). In eLS, John Wiley & Sons, Ltd (Ed)2014.
- 593 43. Dosztányi Z. Prediction of protein disorder based on IUPred. *Protein Sci*.  
594 2018;27(1):331-40.
- 595 44. Yang Y, Jones HB, Dao TP, Castañeda CA. Single Amino Acid Substitutions in Stickers,  
596 but Not Spacers, Substantially Alter UBQLN2 Phase Transitions and Dense Phase Material  
597 Properties. *The Journal of Physical Chemistry B*. 2019;123(17):3618-29.
- 598 45. Luo H, Lee N, Wang X, Li Y, Schmelzer A, Hunter AK, et al. Liquid-liquid phase  
599 separation causes high turbidity and pressure during low pH elution process in Protein A  
600 chromatography. *Journal of Chromatography A*. 2017;1488:57-67.
- 601 46. Alberti S, Gladfelter A, Mittag T. Considerations and Challenges in Studying Liquid-  
602 Liquid Phase Separation and Biomolecular Condensates. *Cell*. 2019;176(3):419-34.
- 603 47. Wang J, Choi J-M, Holehouse AS, Lee HO, Zhang X, Jahnel M, et al. A Molecular  
604 Grammar Governing the Driving Forces for Phase Separation of Prion-like RNA Binding  
605 Proteins. *Cell*. 2018;174(3):688-99.e16.
- 606 48. Hou Q, Bourgeas R, Pucci F, Rooman M. Computational analysis of the amino acid  
607 interactions that promote or decrease protein solubility. *Scientific reports*. 2018;8(1):14661.
- 608 49. Murthy AC, Dignon GL, Kan Y, Zerze GH, Parekh SH, Mittal J, et al. Molecular  
609 interactions underlying liquid-liquid phase separation of the FUS low-complexity domain. *Nature*  
610 *structural & molecular biology*. 2019;26(7):637-48.
- 611 50. Ryabov EV, Kim SH, Taliansky M. Identification of a nuclear localization signal and  
612 nuclear export signal of the umbraviral long-distance RNA movement protein. *J Gen Virol*.  
613 2004;85(Pt 5):1329-33.
- 614 51. Savada RP, Bonham-Smith PC. Charge versus sequence for nuclear/nucleolar  
615 localization of plant ribosomal proteins. *Plant molecular biology*. 2013;81(4-5):477-93.
- 616 52. Musinova YR, Kananykhina EY, Potashnikova DM, Lisitsyna OM, Sheval EV. A charge-  
617 dependent mechanism is responsible for the dynamic accumulation of proteins inside nucleoli.  
618 *Biochimica et Biophysica Acta (BBA) - Molecular Cell Research*. 2015;1853(1):101-10.
- 619 53. Frottin F, Schueder F, Tiwary S, Gupta R, Körner R, Schlichthaerle T, et al. The  
620 nucleolus functions as a phase-separated protein quality control compartment. *Science*.  
621 2019:eaaw9157.

- 622 54. Rakitina DV, Taliansky M, Brown JWS, Kalinina NO. Two RNA-binding sites in plant  
623 fibrillar provide interactions with various RNA substrates. *Nucleic Acids Res.*  
624 2011;39(20):8869-80.
- 625 55. Yao RW, Xu G, Wang Y, Shan L, Luan PF, Wang Y, et al. Nascent Pre-rRNA Sorting via  
626 Phase Separation Drives the Assembly of Dense Fibrillar Components in the Human Nucleolus.  
627 *Mol Cell.* 2019;76(5):767-83.e11.
- 628 56. Berry J, Weber SC, Vaidya N, Haataja M, Brangwynne CP. RNA transcription modulates  
629 phase transition-driven nuclear body assembly. *Proceedings of the National Academy of*  
630 *Sciences.* 2015;112(38):E5237.
- 631 57. Lindbo JA. TRBO: A High-Efficiency Tobacco Mosaic Virus RNA-Based Overexpression  
632 Vector. *Plant Physiology.* 2007;145(4):1232.
- 633 58. Ryabov EV, Robinson DJ, Taliansky ME. A plant virus-encoded protein facilitates long-  
634 distance movement of heterologous viral RNA. *Proceedings of the National Academy of*  
635 *Sciences.* 1999;96(4):1212-7.
- 636 59. Krapp S, Greiner E, Amin B, Sonnewald U, Krenz B. The stress granule component  
637 G3BP is a novel interaction partner for the nuclear shuttle proteins of the nanovirus pea necrotic  
638 yellow dwarf virus and geminivirus abutilon mosaic virus. *Virus Res.* 2017;227:6-14.
- 639 60. Tourrière H, Chebli K, Zekri L, Courselaud B, Blanchard JM, Bertrand E, et al. The  
640 RasGAP-associated endoribonuclease G3BP assembles stress granules. *J Cell Biol.*  
641 2003;160(6):823-31.
- 642 61. Guillén-Boixet J, Kopach A, Holehouse AS, Wittmann S, Jahnel M, Schlüßler R, et al.  
643 RNA-Induced Conformational Switching and Clustering of G3BP Drive Stress Granule  
644 Assembly by Condensation. *Cell.* 2020;181(2):346-61.e17.
- 645 62. Nevers Q, Albertini AA, Lagaudrière-Gesbert C, Gaudin Y. Negri bodies and other virus  
646 membrane-less replication compartments. *Biochim Biophys Acta Mol Cell Res.*  
647 2020;1867(12):118831-.
- 648 63. Lahaye X, Vidy A, Pomier C, Obiang L, Harper F, Gaudin Y, et al. Functional  
649 characterization of Negri bodies (NBs) in rabies virus-infected cells: Evidence that NBs are sites  
650 of viral transcription and replication. *Journal of virology.* 2009;83(16):7948-58.
- 651 64. Guseva S, Milles S, Jensen MR, Salvi N, Kleman J-P, Maurin D, et al. Measles virus  
652 nucleo- and phosphoproteins form liquid-like phase-separated compartments that promote  
653 nucleocapsid assembly. *Sci Adv.* 2020;6(14):eaaz7095-eaaz.
- 654 65. Belov GA, van Kuppeveld FJ. (+)RNA viruses rewire cellular pathways to build  
655 replication organelles. *Curr Opin Virol.* 2012;2(6):740-7.
- 656 66. Nagy PD, Strating JR, van Kuppeveld FJ. Building Viral Replication Organelles: Close  
657 Encounters of the Membrane Types. *PLoS Pathog.* 2016;12(10):e1005912.



- 658 67. Carlson CR, Asfaha JB, Ghent CM, Howard CJ, Hartooni N, Safari M, et al.  
659 Phosphoregulation of Phase Separation by the SARS-CoV-2 N Protein Suggests a Biophysical  
660 Basis for its Dual Functions. *Mol Cell*. 2020;80(6):1092-103.e4.
- 661 68. Boeynaems S, Bogaert E, Kovacs D, Konijnenberg A, Timmerman E, Volkov A, et al.  
662 Phase Separation of C9orf72 Dipeptide Repeats Perturbs Stress Granule Dynamics. *Mol Cell*.  
663 2017;65(6):1044-55.e5.
- 664 69. Brangwynne Clifford P, Tompa P, Pappu Rohit V. Polymer physics of intracellular phase  
665 transitions. *Nature Physics*. 2015;11(11):899-904.
- 666 70. Reuper H, Amari K, Krenz B. Analyzing the G3BP-like gene family of Arabidopsis  
667 thaliana in early turnip mosaic virus infection. *Scientific reports*. 2021;11(1):2187.
- 668 71. Fischer JW, Busa VF, Shao Y, Leung AKL. Structure-Mediated RNA Decay by UPF1  
669 and G3BP1. *Mol Cell*. 2020;78(1):70-84.e6.
- 670 72. Simon AE, Miller WA. 3' cap-independent translation enhancers of plant viruses. *Annu*  
671 *Rev Microbiol*. 2013;67:21-42.
- 672 73. May JP, Yuan X, Sawicki E, Simon AE. RNA virus evasion of nonsense-mediated decay.  
673 *PLoS Pathog*. 2018;14(11):e1007459.
- 674 74. May JP, Simon AE. Targeting of viral RNAs by Upf1-mediated RNA decay pathways.  
675 *Curr Opin Virol*. 2020;47:1-8.
- 676 75. Brown JAL, Roberts TL, Richards R, Woods R, Birrell G, Lim YC, et al. A novel role for  
677 hSMG-1 in stress granule formation. *Mol Cell Biol*. 2011;31(22):4417-29.
- 678 76. Busch DJ, Houser JR, Hayden CC, Sherman MB, Lafer EM, Stachowiak JC. Intrinsically  
679 disordered proteins drive membrane curvature. *Nature communications*. 2015;6:7875.
- 680 77. DeGroot ACM, Busch DJ, Hayden CC, Mihelic SA, Alpar AT, Behar M, et al. Entropic  
681 Control of Receptor Recycling Using Engineered Ligands. *Biophysical journal*.  
682 2018;114(6):1377-88.
- 683 78. Boeynaems S, De Decker M, Tompa P, Van Den Bosch L. Arginine-rich Peptides Can  
684 Actively Mediate Liquid-liquid Phase Separation. *Bio-protocol*. 2017;7(17):e2525.
- 685 79. Merai Z, Kerenyi Z, Molnar A, Barta E, Valoczi A, Bisztray G, et al. Aureusvirus P14 is  
686 an efficient RNA silencing suppressor that binds double-stranded RNAs without size specificity.  
687 *J Virol*. 2005;79(11):7217-26.
- 688 80. Stauffer W, Sheng H, Lim HN. EzColocalization: An ImageJ plugin for visualizing and  
689 measuring colocalization in cells and organisms. *Scientific reports*. 2018;8(1):15764.
- 690
- 691

692 **FIGURE LEGENDS**

693 **Fig. 1. p26 forms poorly dynamic condensates *in vivo*.** (A) PEMV2 is a small positive-sense  
694 RNA plant virus that encodes 4 genes, including the p26 long-distance movement protein. Free  
695 GFP and p26 C-terminally fused with GFP (p26:GFP) were expressed from binary expression  
696 plasmids under the constitutive CaMV 35S promoter (B) Following agroinfiltration of *N.*  
697 *benthamiana*, confocal microscopy showed diffuse cytoplasmic and nuclear expression of free  
698 GFP whereas p26:GFP formed large cytoplasmic bodies. Note that the majority of plant  
699 mesophyll cells is taken up by a single large vacuole. Differential interference contrast (DIC)  
700 microscopy was used for p26:GFP samples to visualize cell borders. Bar scale: 20  $\mu$ m. (C)  
701 FRAP analysis of p26:GFP was performed by photobleaching cytoplasmic condensates and  
702 monitoring fluorescence recovery. A representative p26:GFP condensate is shown before  
703 photobleaching, immediately following photobleaching (5 s), and at 120 s. Bar scale 5  $\mu$ m.  
704 Average FRAP intensity is shown from seven FRAP experiments and shaded area represents  
705 95% confidence interval.

706  
707 **Fig. 2. p26 is intrinsically disordered and phase separates through electrostatic**  
708 **interactions.** (A) PEMV2 p26 contains a large intrinsically disordered region (IDR) spanning  
709 amino acids 1-132. The dispensable cell-to-cell movement protein, p27, is highly ordered. (B)  
710 The p26 IDR was fused to the N-terminus of GFP for bacterial expression and contained an N-  
711 terminal histidine tag. The p26 IDR sequence is shown with highlighted residues corresponding  
712 to basic (blue) or acidic (red) residues. (C) Recombinant proteins used in this study were  
713 analyzed by SDS-PAGE to assess size and purity. Proteins were stained using Coomassie  
714 Blue. Marker (M) sizes are shown in kilodaltons (kDa). Note: R/K-G ran markedly higher both *in*  
715 *vitro* and *in vivo* (see Fig. 4B). (D) Molecular crowding was induced with 10% PEG in the  
716 presence of 24  $\mu$ M free GFP or IDR-GFP. The IDR-GFP solution became turbid in the presence  
717 of PEG, indicative of phase separation. (E) *In vitro* phase separation assays were visualized by

718 confocal microscopy. 8  $\mu\text{M}$  protein was used for all assays and 10% PEG-8000 was added as a  
719 crowding agent (Middle panels). One molar NaCl was added to disrupt electrostatic interactions  
720 (Right panel). 10% 1,6 hexanediol was added to IDR-GFP phase separations to assess the  
721 fluidity of condensates. Bar scale: 20  $\mu\text{m}$ . (F) Phase diagram for IDR-GFP gives an apparent  
722  $C_{\text{sat}} = 4 \mu\text{M}$  and sensitivity to high NaCl concentrations. Results are representative of two  
723 independent experiments. (G) IDR mutants (8  $\mu\text{M}$ ) were examined using *in vitro* phase  
724 separation assays. R/K-G formed irregular aggregates at high concentration (24  $\mu\text{M}$ ) and D/E-G  
725 showed reduced phase separation compared to IDR-GFP. R-K and VLIMFYW-S mutants  
726 appeared like wild-type IDR. Bar scale: 20  $\mu\text{m}$  (H) D/E-G had significantly reduced turbidity  
727 ( $\text{OD}_{600}$ ) under crowding conditions when compared to IDR-GFP at 8  $\mu\text{M}$  and 24  $\mu\text{M}$   
728 concentrations. Data represents three independent replicates for each condition. Bars denote  
729 standard deviations. \*\*\*  $P < 0.001$  unpaired t test (I) Mean condensate sizes for all mutants  
730 (excluding R/K-G) were plotted by cumulative distribution frequency. Particle sizes were  
731 measured from three representative 20x fields using ImageJ.  $P$  values represent results from  
732 two-tailed Mann-Whitney tests compared to IDR-GFP. ns: not significant. (J) FRAP was  
733 performed for *in vitro* condensates. 24  $\mu\text{M}$  protein was used for R/K-G and D/E-G. Inset shows  
734 representative IDR-GFP and D/E-G droplets, or R/K-G aggregates. Bar scale: 10  $\mu\text{m}$ . Table  
735 shows %recovery after 2 minutes with Mann-Whitney rank test comparisons against IDR-GFP.  
736 Data represents 7-10 separate FRAP measurements for each mutant. Shaded areas represent  
737 95% confidence intervals.

738

739 **Fig. 3. Phase separation supports p26 partitioning in Fib2 droplets and vRNP formation.**

740 (A) p26:GFP, R/K-G, and D/E-G GFP fusions were expressed in *N. benthamiana* leaves  
741 following agroinfiltration. Prior to imaging, leaves were infiltrated with 5  $\mu\text{g}/\text{mL}$  DAPI to stain  
742 nuclei. 20x and 63x fields are shown. Arrows denote the nucleolus (No) or cajal bodies (CB).  
743 Bar scale: Top 20  $\mu\text{m}$ ; Bottom 10  $\mu\text{m}$ . (B) Nuclear localization of p26:GFP or D/E-G was

744 quantified using Mander's overlap coefficient (MOC) using ImageJ and EzColocalization [80].  
745 White outlines represent thresholded nuclei. Representative results are from ten 20x fields. Bar  
746 scale: 50  $\mu\text{m}$ . Error bars denote standard deviations. \*\*\*\* $P < 0.0001$  unpaired t test. (C) Fib2  
747 contains an N-terminal glycine- and arginine-rich (GAR) domain that is intrinsically disordered.  
748 (D) Either the Fib2 GAR domain (Fib2<sub>GAR</sub>) or full-length Fib2 (Fib2<sub>FL</sub>) were fused to mCherry and  
749 purified from *E. coli* and analyzed by SDS-PAGE. Molecular weight (kDa) marker is shown. (E)  
750 mCherry, Fib2<sub>GAR</sub>, and Fib2<sub>FL</sub> were examined by confocal microscopy after inducing phase  
751 separation with 10% PEG-8000 alone or in the presence of 1 M NaCl. 8  $\mu\text{M}$  protein was used  
752 for all assays. Bar scale: 20  $\mu\text{m}$ . (F) FRAP analyses of Fib2<sub>GAR</sub> and Fib2<sub>FL</sub> condensates. Shaded  
753 areas represent 95% confidence intervals. Results are from 8 separate FRAP experiments.  
754 Table shows %recovery after two minutes. \*\*\*\*  $P < 0.0001$  Mann-Whitney rank test comparison  
755 (G) Fib2<sub>GAR</sub> and Fib2<sub>FL</sub> droplets were pre-formed prior to addition of PEMV2-Cy5 at a 500:1  
756 protein:RNA molar ratio. PEMV2 RNA was only sorted to Fib2<sub>FL</sub> condensates. Bar scale: 20  $\mu\text{m}$ .  
757 (H) IDR-GFP droplets were pre-formed prior to addition of PEMV2-Cy5 or TCV-Cy5 at a 500:1  
758 protein:RNA molar ratio. Bar scale: 20  $\mu\text{m}$ . (I) The fraction of IDR-GFP signal that was positive  
759 for Cy5-labelled RNA was determined by MOC analysis using EzColocalization [80]. ns: not  
760 significant by unpaired t test. Bars denote standard deviations. Three 20x fields were quantified  
761 for each condition. (J) Fib2<sub>GAR</sub> droplets were pre-formed using 24  $\mu\text{M}$  protein before the addition  
762 of 4  $\mu\text{M}$  IDR-GFP or R/K-G. Sorting of IDR-GFP to Fib2 droplets was observed whereas R/K-G  
763 remained in the bulk phase and failed to partition in Fib2<sub>GAR</sub> droplets. Bar scale 10  $\mu\text{m}$ . (K) IDR-  
764 GFP, Fib2<sub>FL</sub>, and PEMV2-Cy5 RNA were mixed at a 500:500:1 molar ratio after pre-forming  
765 Fib2<sub>FL</sub> and IDR-GFP condensates under crowding conditions. Droplets containing all  
766 components were observed. Bar scale: 10  $\mu\text{m}$ . Images in all panels are representative of at  
767 least three independent experiments.  
768

769 **Fig. 4. Phase separation-deficient p26 mutants fail to systemically traffic a virus vector.**  
770 (A) pJL-TRBO TMV vector lacks CP and is severely impaired in systemic trafficking. Free GFP,  
771 p26:GFP, R/K-G, and D/E-G GFP fusions were inserted into pJL-TRBO to test whether  
772 systemic trafficking could be restored. (B) Following agroinfiltration of *N. benthamiana* leaves,  
773 TMV infections were established in local leaves. Free GFP, or GFP-fusion proteins were  
774 visualized and detected in local leaves at 4 dpi by UV exposure (Left) or western blotting  
775 (Right). Rubisco serves as a loading control. Red asterisks denote free GFP or GFP-fusion  
776 bands. (C) At 14 dpi, systemic leaves were imaged prior to total RNA extraction. RT-PCR was  
777 used to amplify 100-200 bp fragments targeting either the TMV replicase or actin as a control. -  
778 RT: No reverse transcriptase controls. Two pools of 3-4 leaves are shown for each construct.  
779 Results are representative of three independent experiments consisting of at least 4  
780 plants/construct.

781  
782 **Fig. 5. p26 is sorted into G3BP phase separations that restrict PEMV2 accumulation.** (A)  
783 *A. thaliana* G3BP contains an ordered NTF2 domain and RNA recognition motif (RRM) in  
784 addition to intrinsically disordered regions. (B) G3BP:RFP or  $\Delta$ NTF2-G3BP:RFP were  
785 agroinfiltrated into *N. benthamiana* leaves. At 3 dpi, plants were either imaged directly or heat  
786 shocked for 45 minutes at 37°C. p26:GFP was co-infiltrated with G3BP:RFP and p26  
787 partitioning in G3BP SGs was observed (White arrows). Scale bar: 20  $\mu$ m. Inset shows western  
788 blot using anti-RFP antibodies to detect full-length G3BP and  $\Delta$ NTF2-G3BP. Rubisco was used  
789 as a loading control (C) G3BP:RFP was agroinfiltrated into systemically-infected TMV:p26:GFP  
790 plants to determine if p26 partitions in G3BP SGs during a virus infection. p26:GFP co-localized  
791 with G3BP SGs as labelled by white arrows. Scale bar: 20  $\mu$ m. (D) Native G3BP expression was  
792 measured in Mock- or PEMV2-infected *N. benthamiana* by RT-qPCR. The co-agroinfiltrated p14  
793 RNA silencing suppressor was used as a reference gene. Data is from three biological

794 replicates. \* $P < 0.05$ ; student's t-test. Bars denote standard error. (E) PEMV2 was agroinfiltrated  
795 alone, or alongside either G3BP or  $\Delta$ NTF2-G3BP. At 3 dpi, total RNAs were extracted and used  
796 for RT-qPCR targeting PEMV2 or p14 (reference gene). Results shown are from 7 biological  
797 replicates from 2 independent experiments. Bars denote standard error. Brown-Forsythe and  
798 Welch ANOVA with multiple comparisons was used to determine if observed differences were  
799 significant. \*\*  $P < 0.01$ .

800

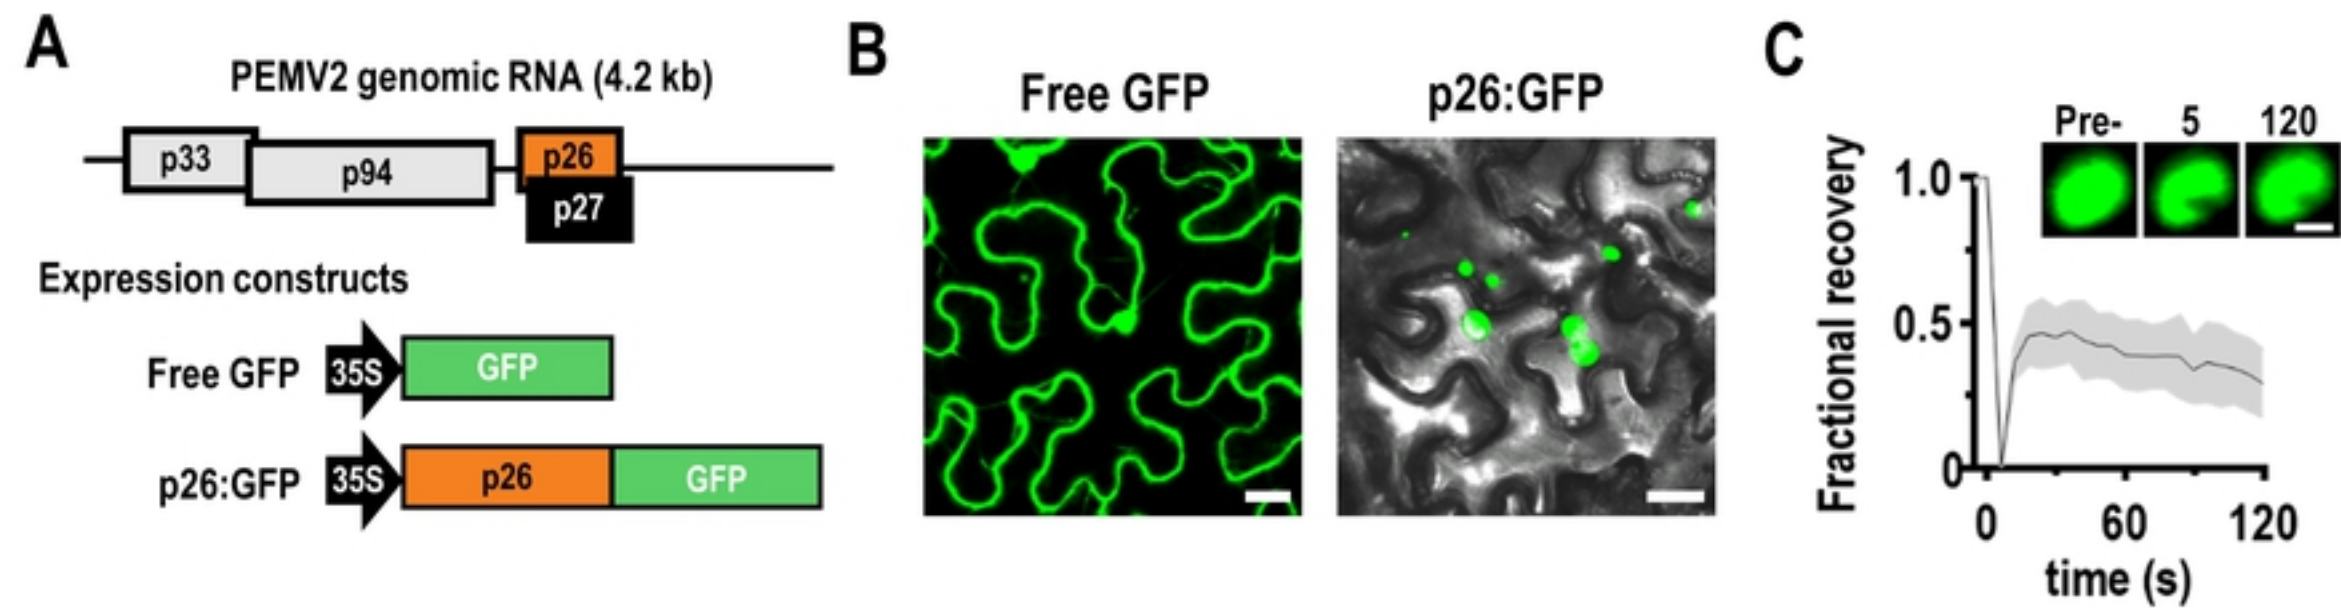

Figure 1

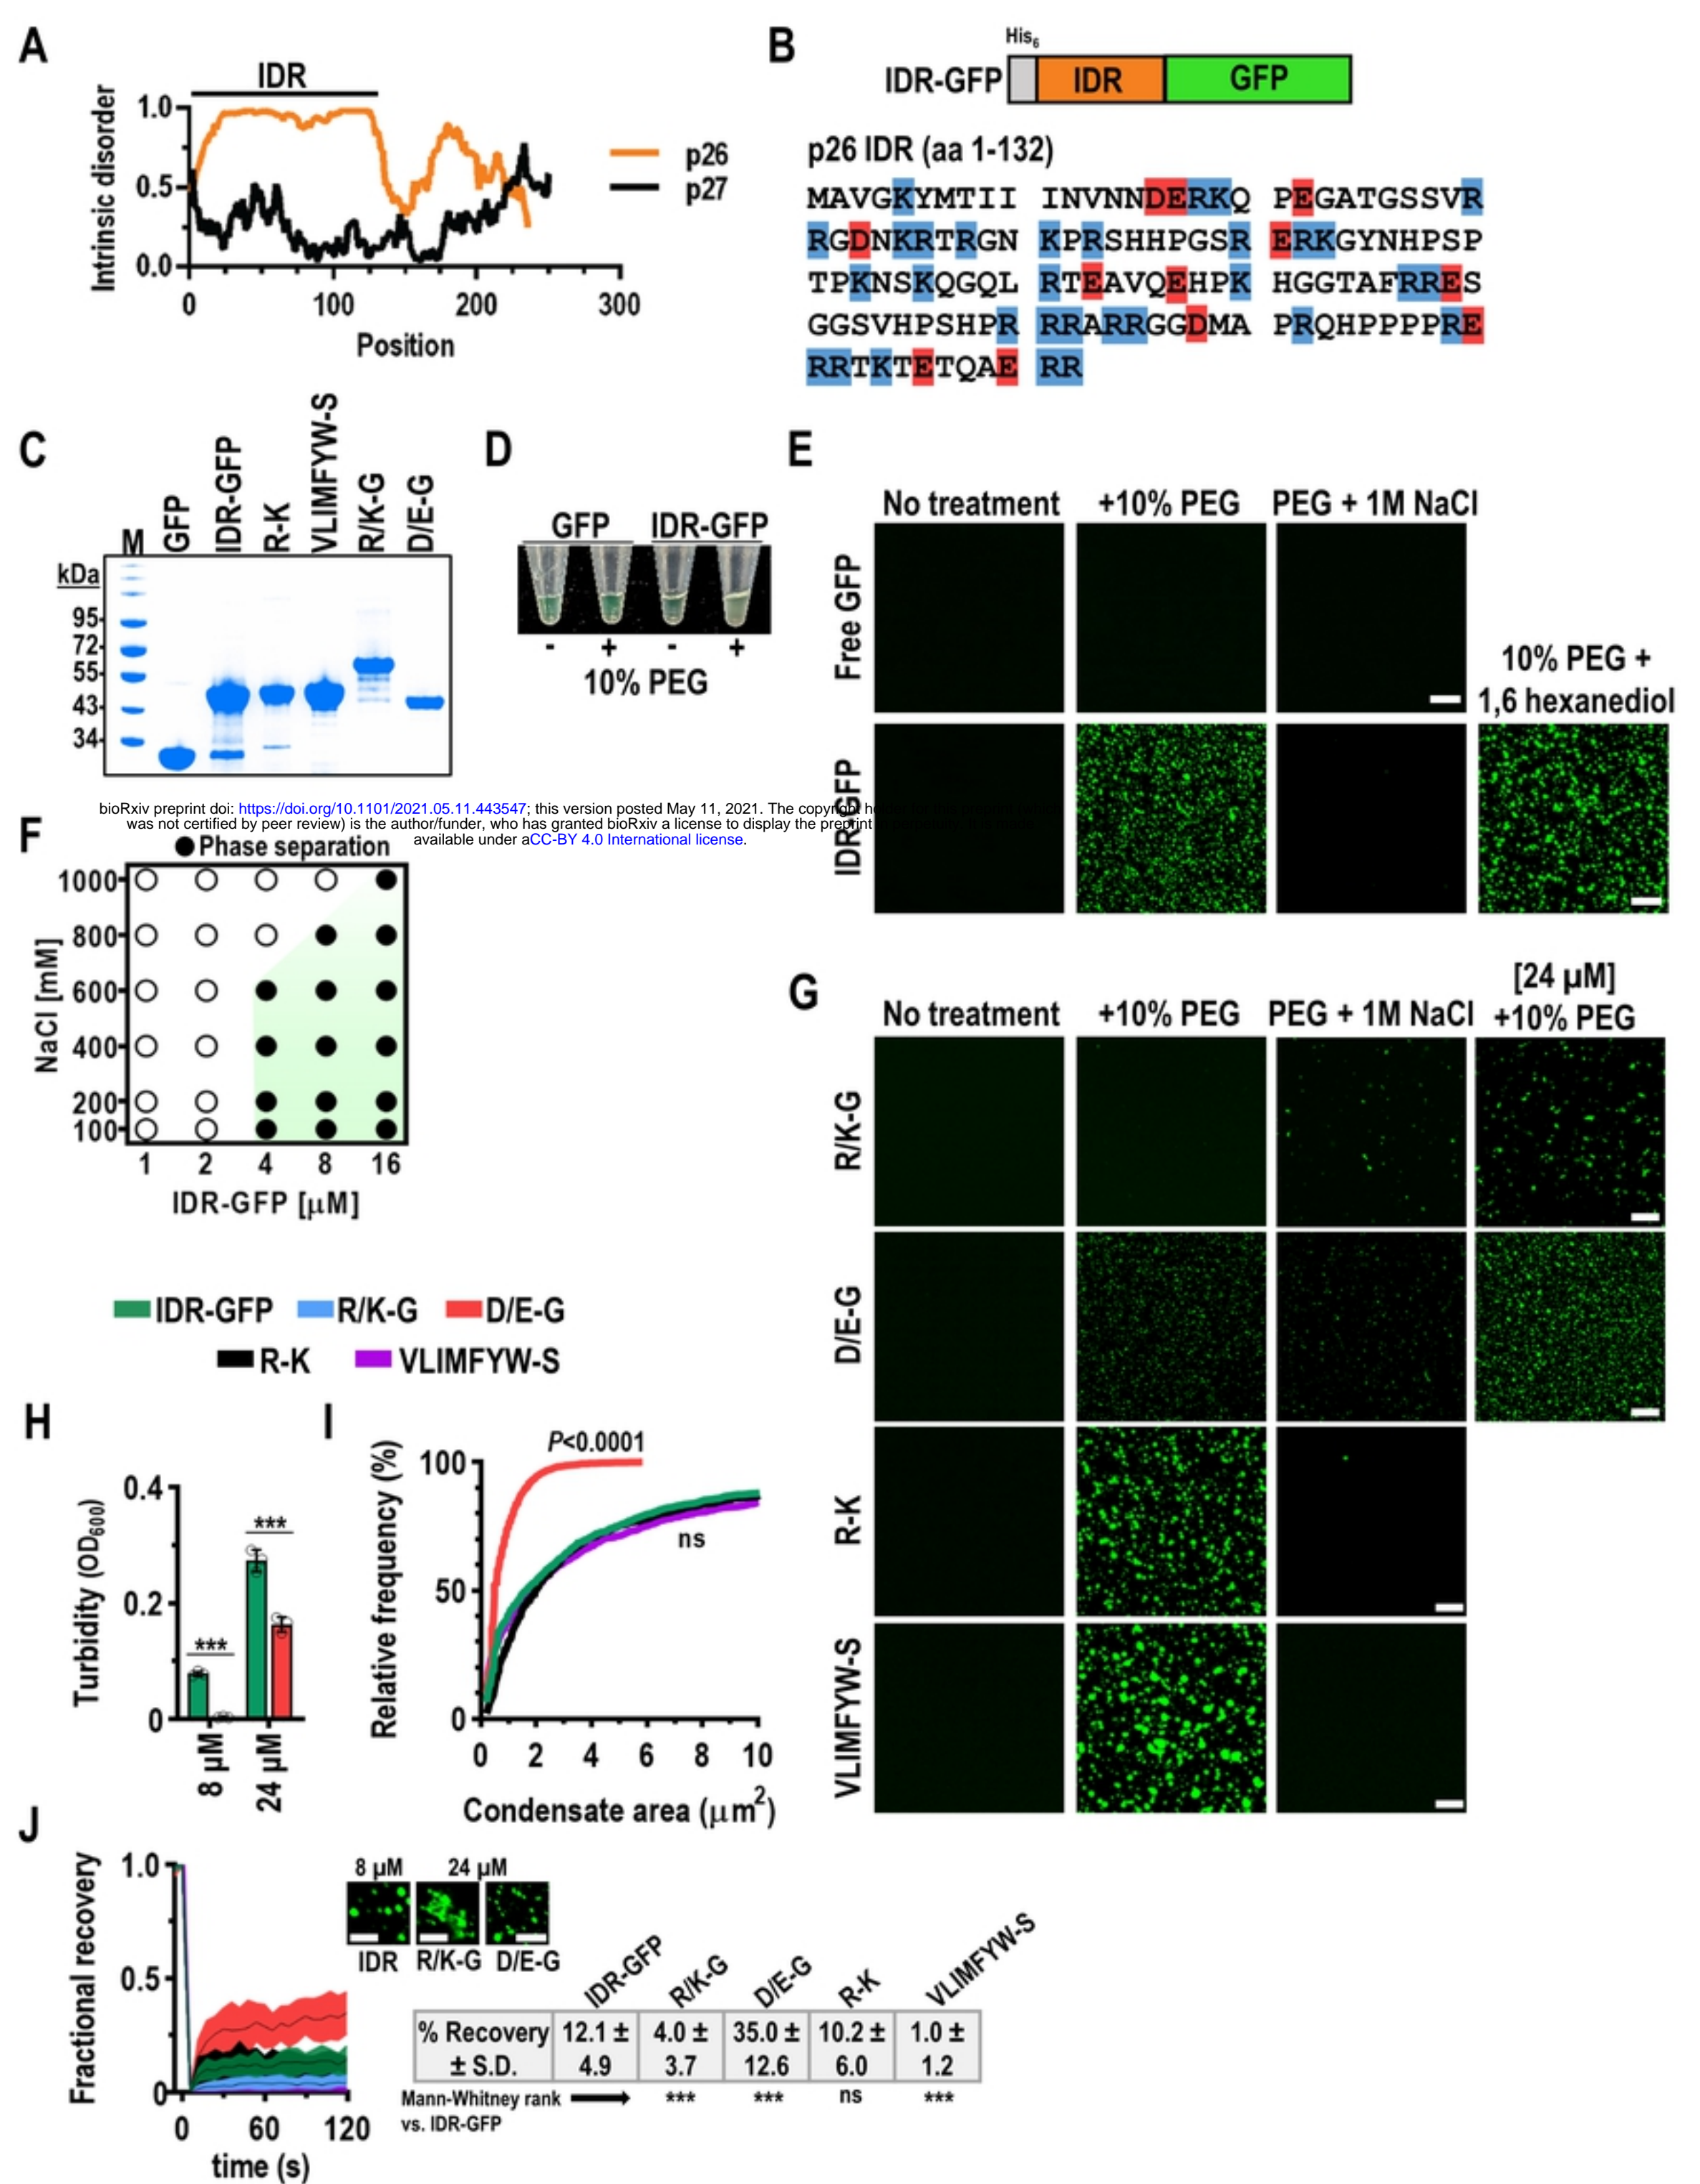

Figure 2



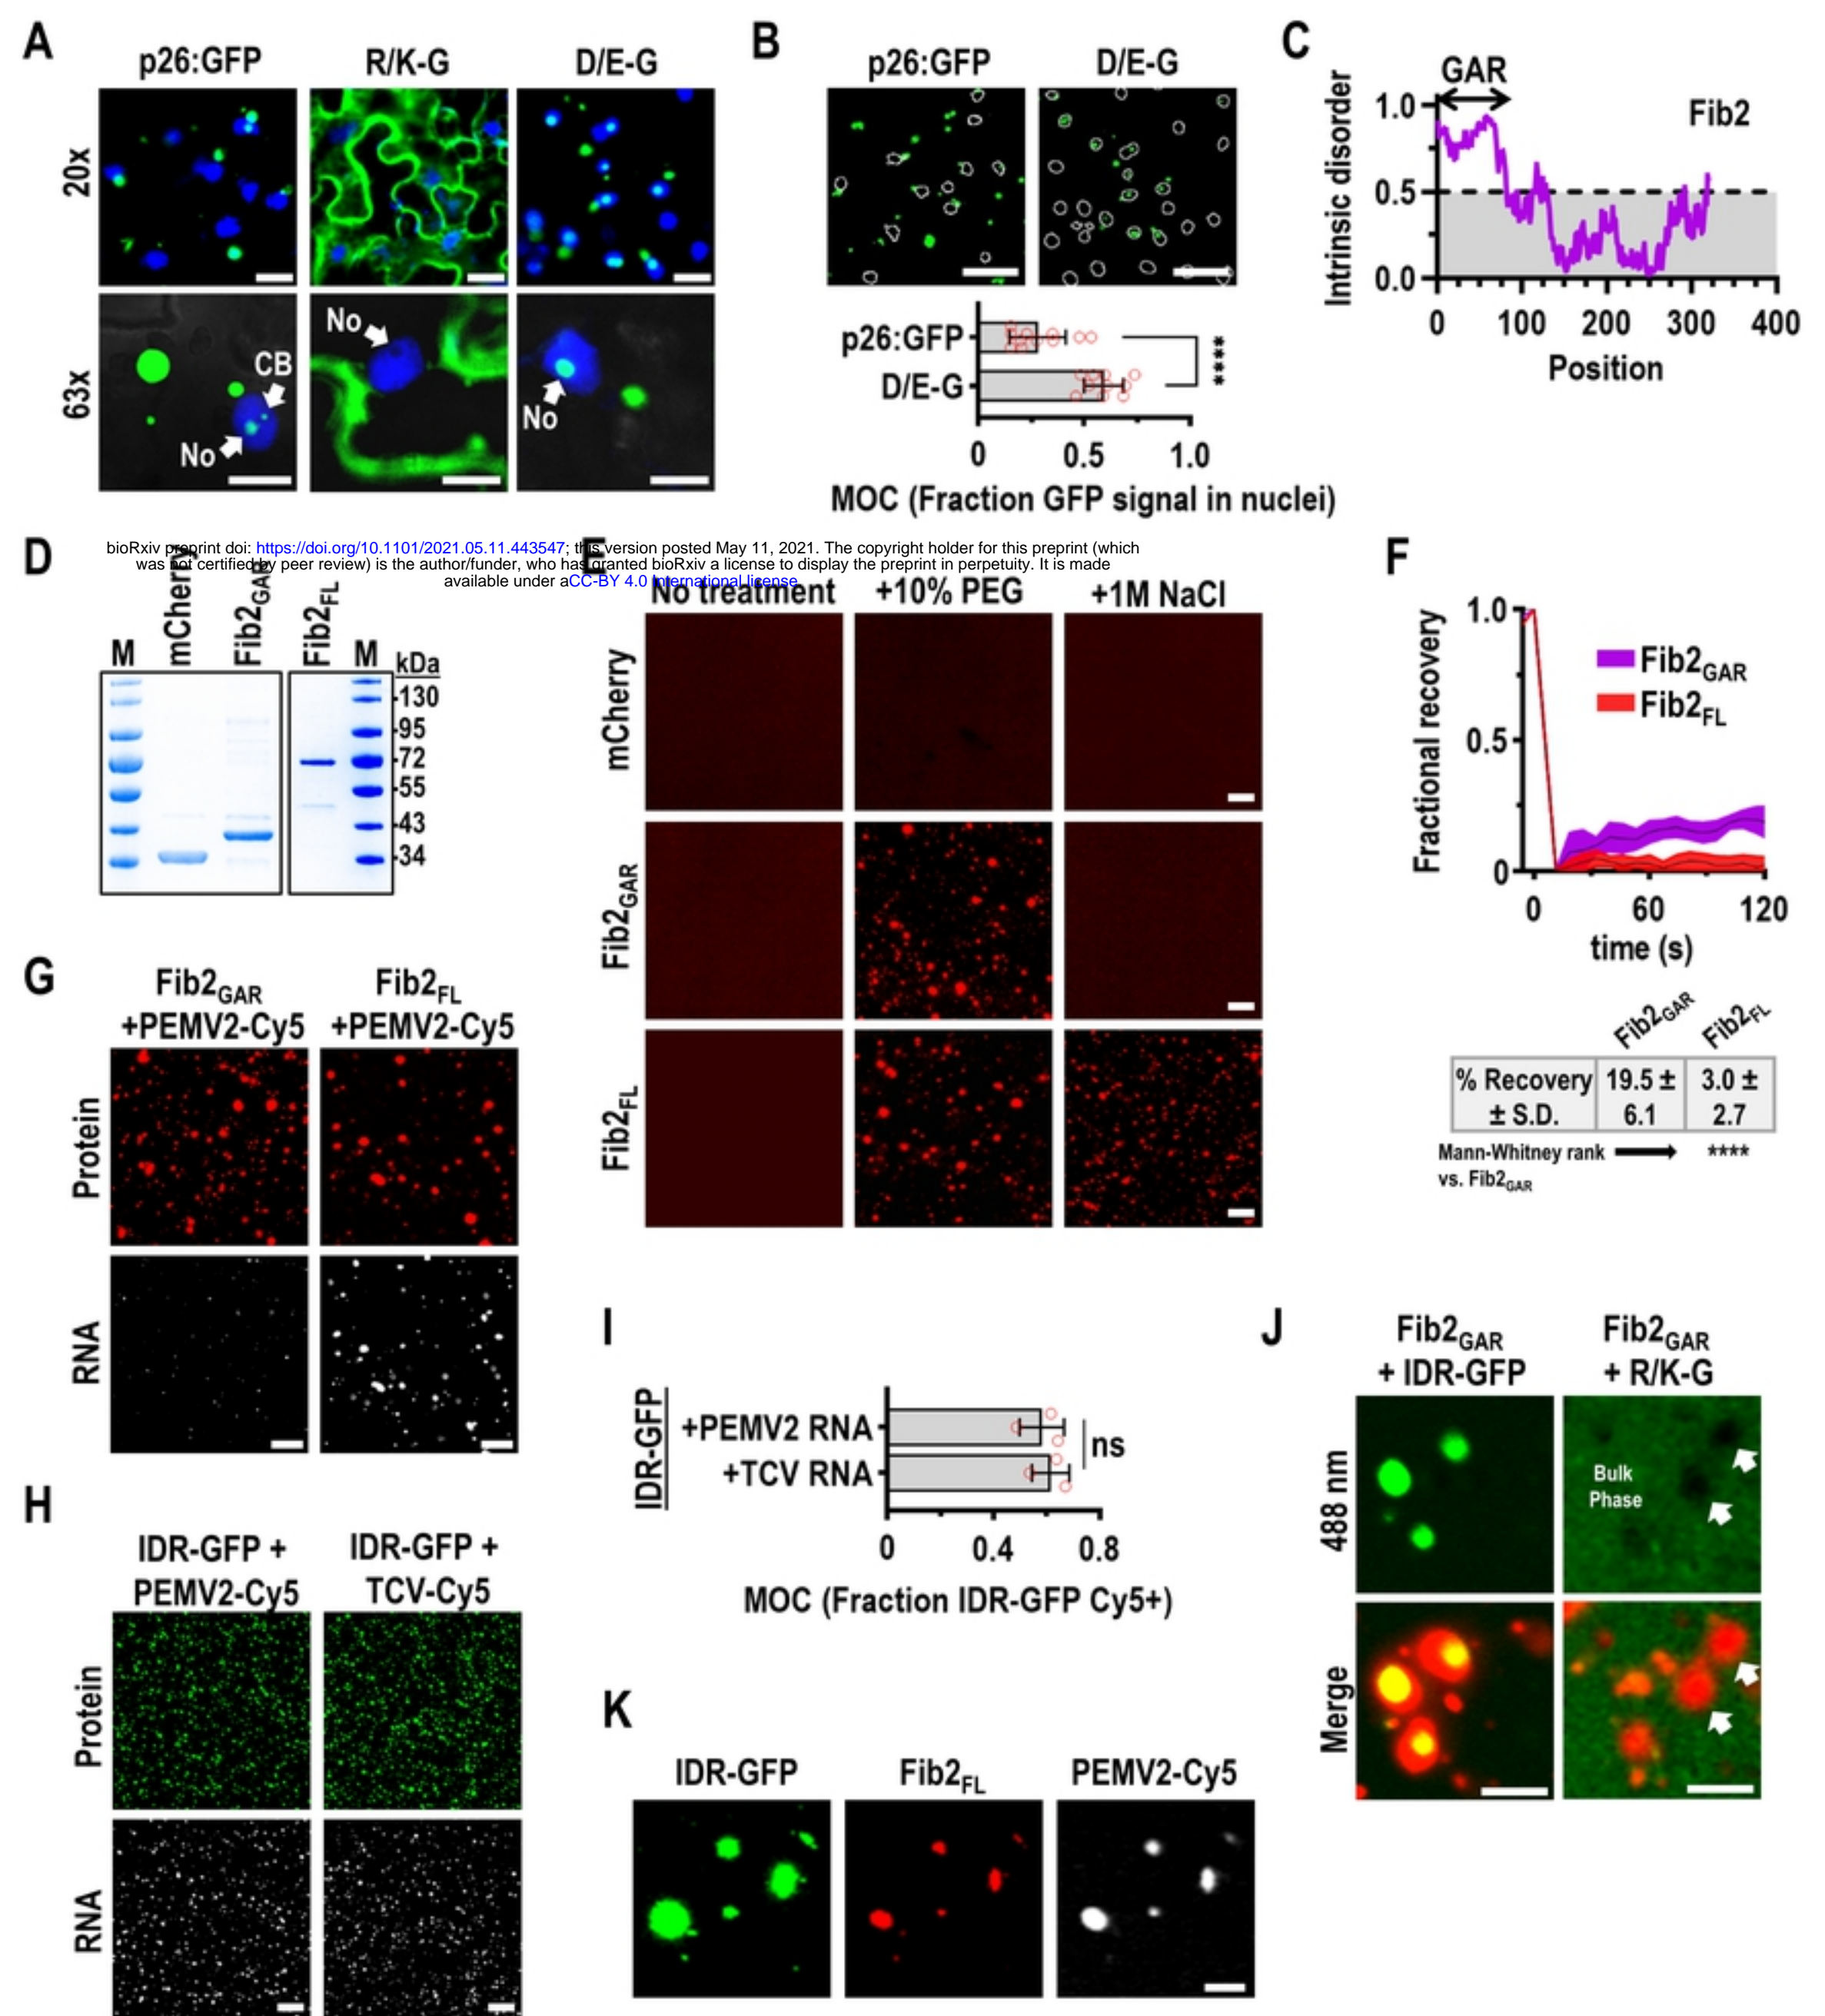

Figure 3

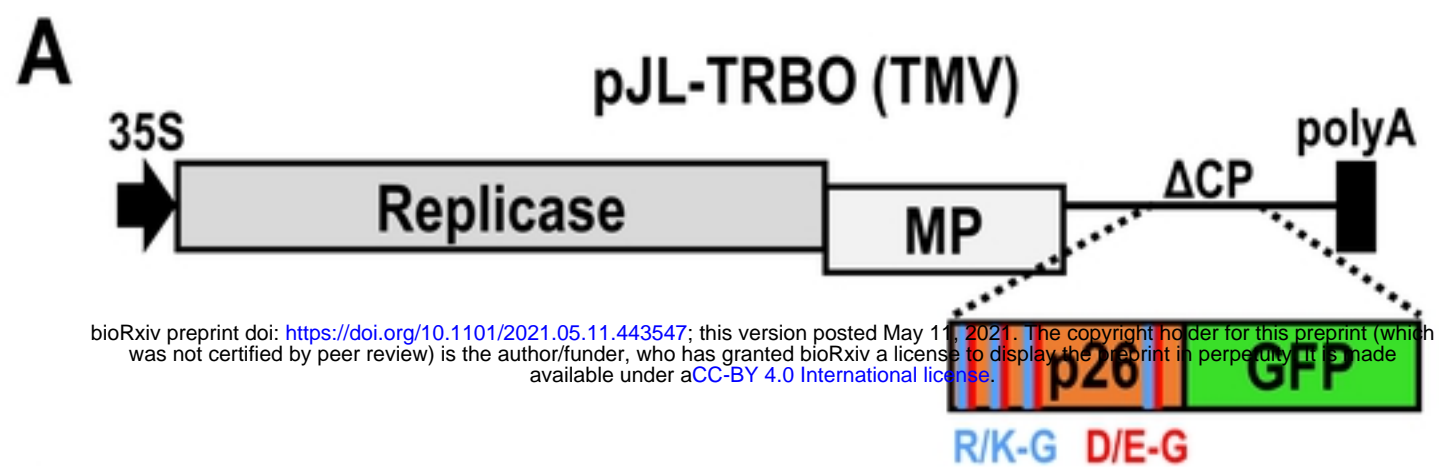

bioRxiv preprint doi: <https://doi.org/10.1101/2021.05.11.443547>; this version posted May 11, 2021. The copyright holder for this preprint (which was not certified by peer review) is the author/funder, who has granted bioRxiv a license to display the preprint in perpetuity. It is made available under aCC-BY 4.0 International license.

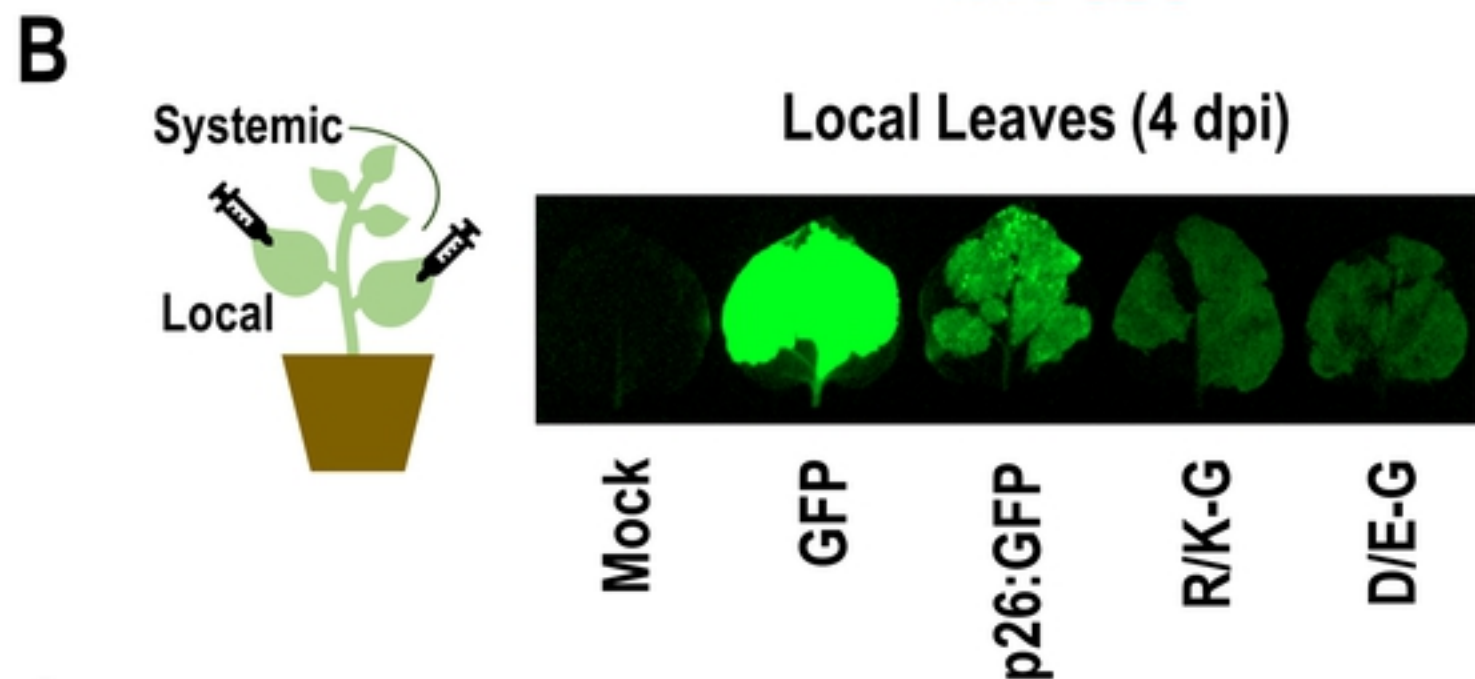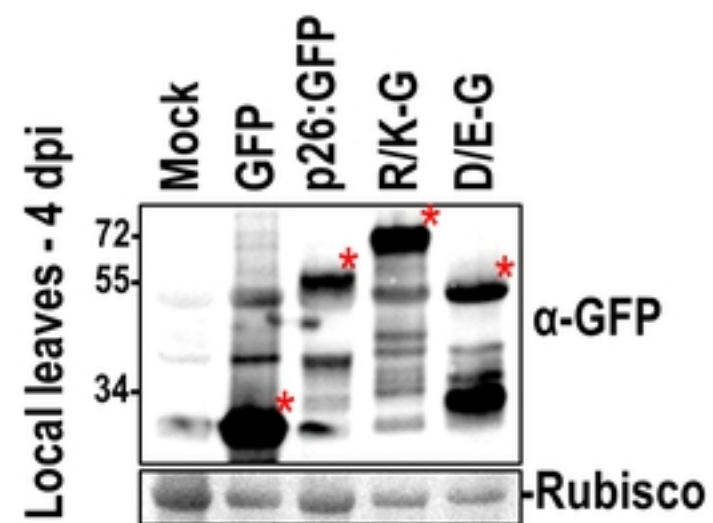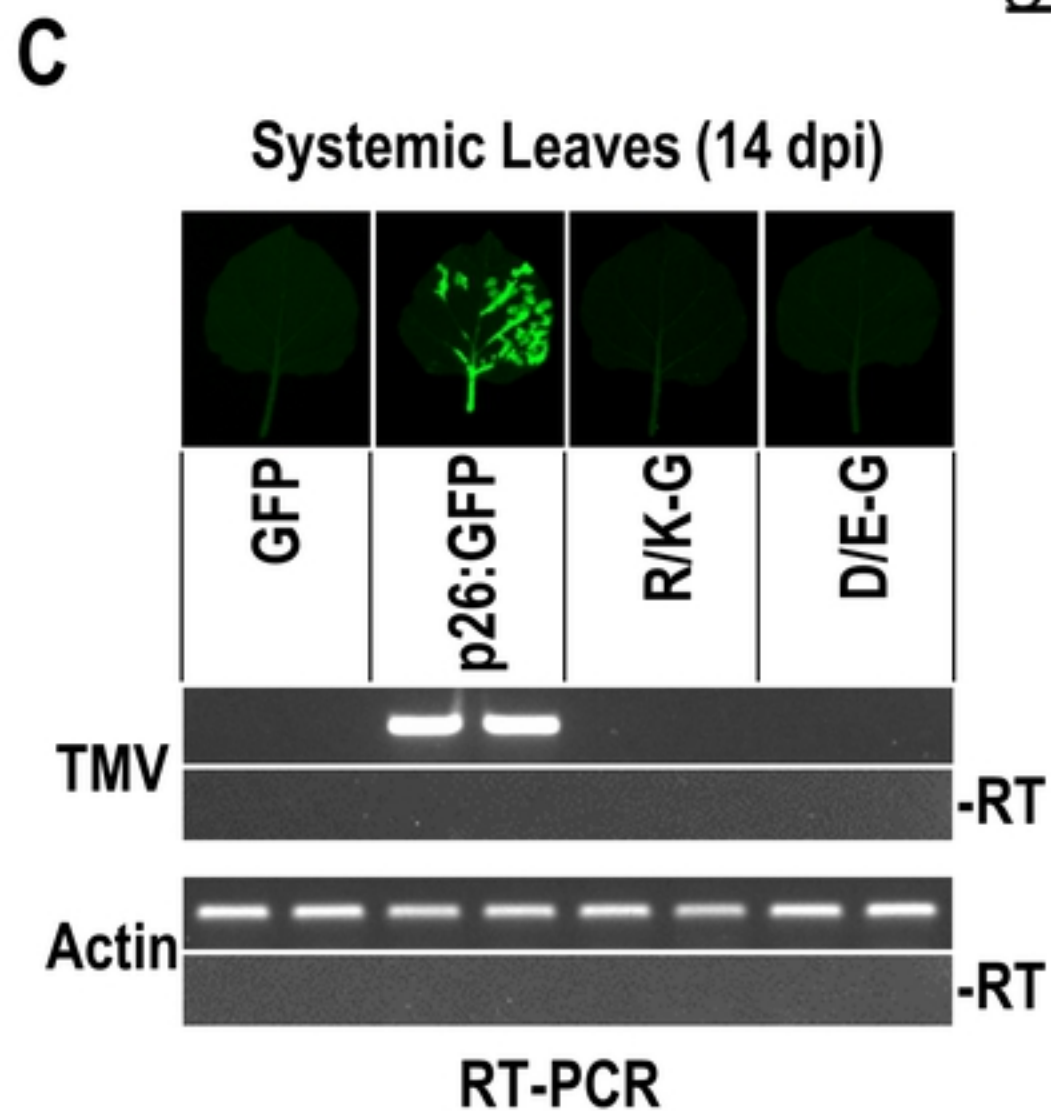

Figure 4

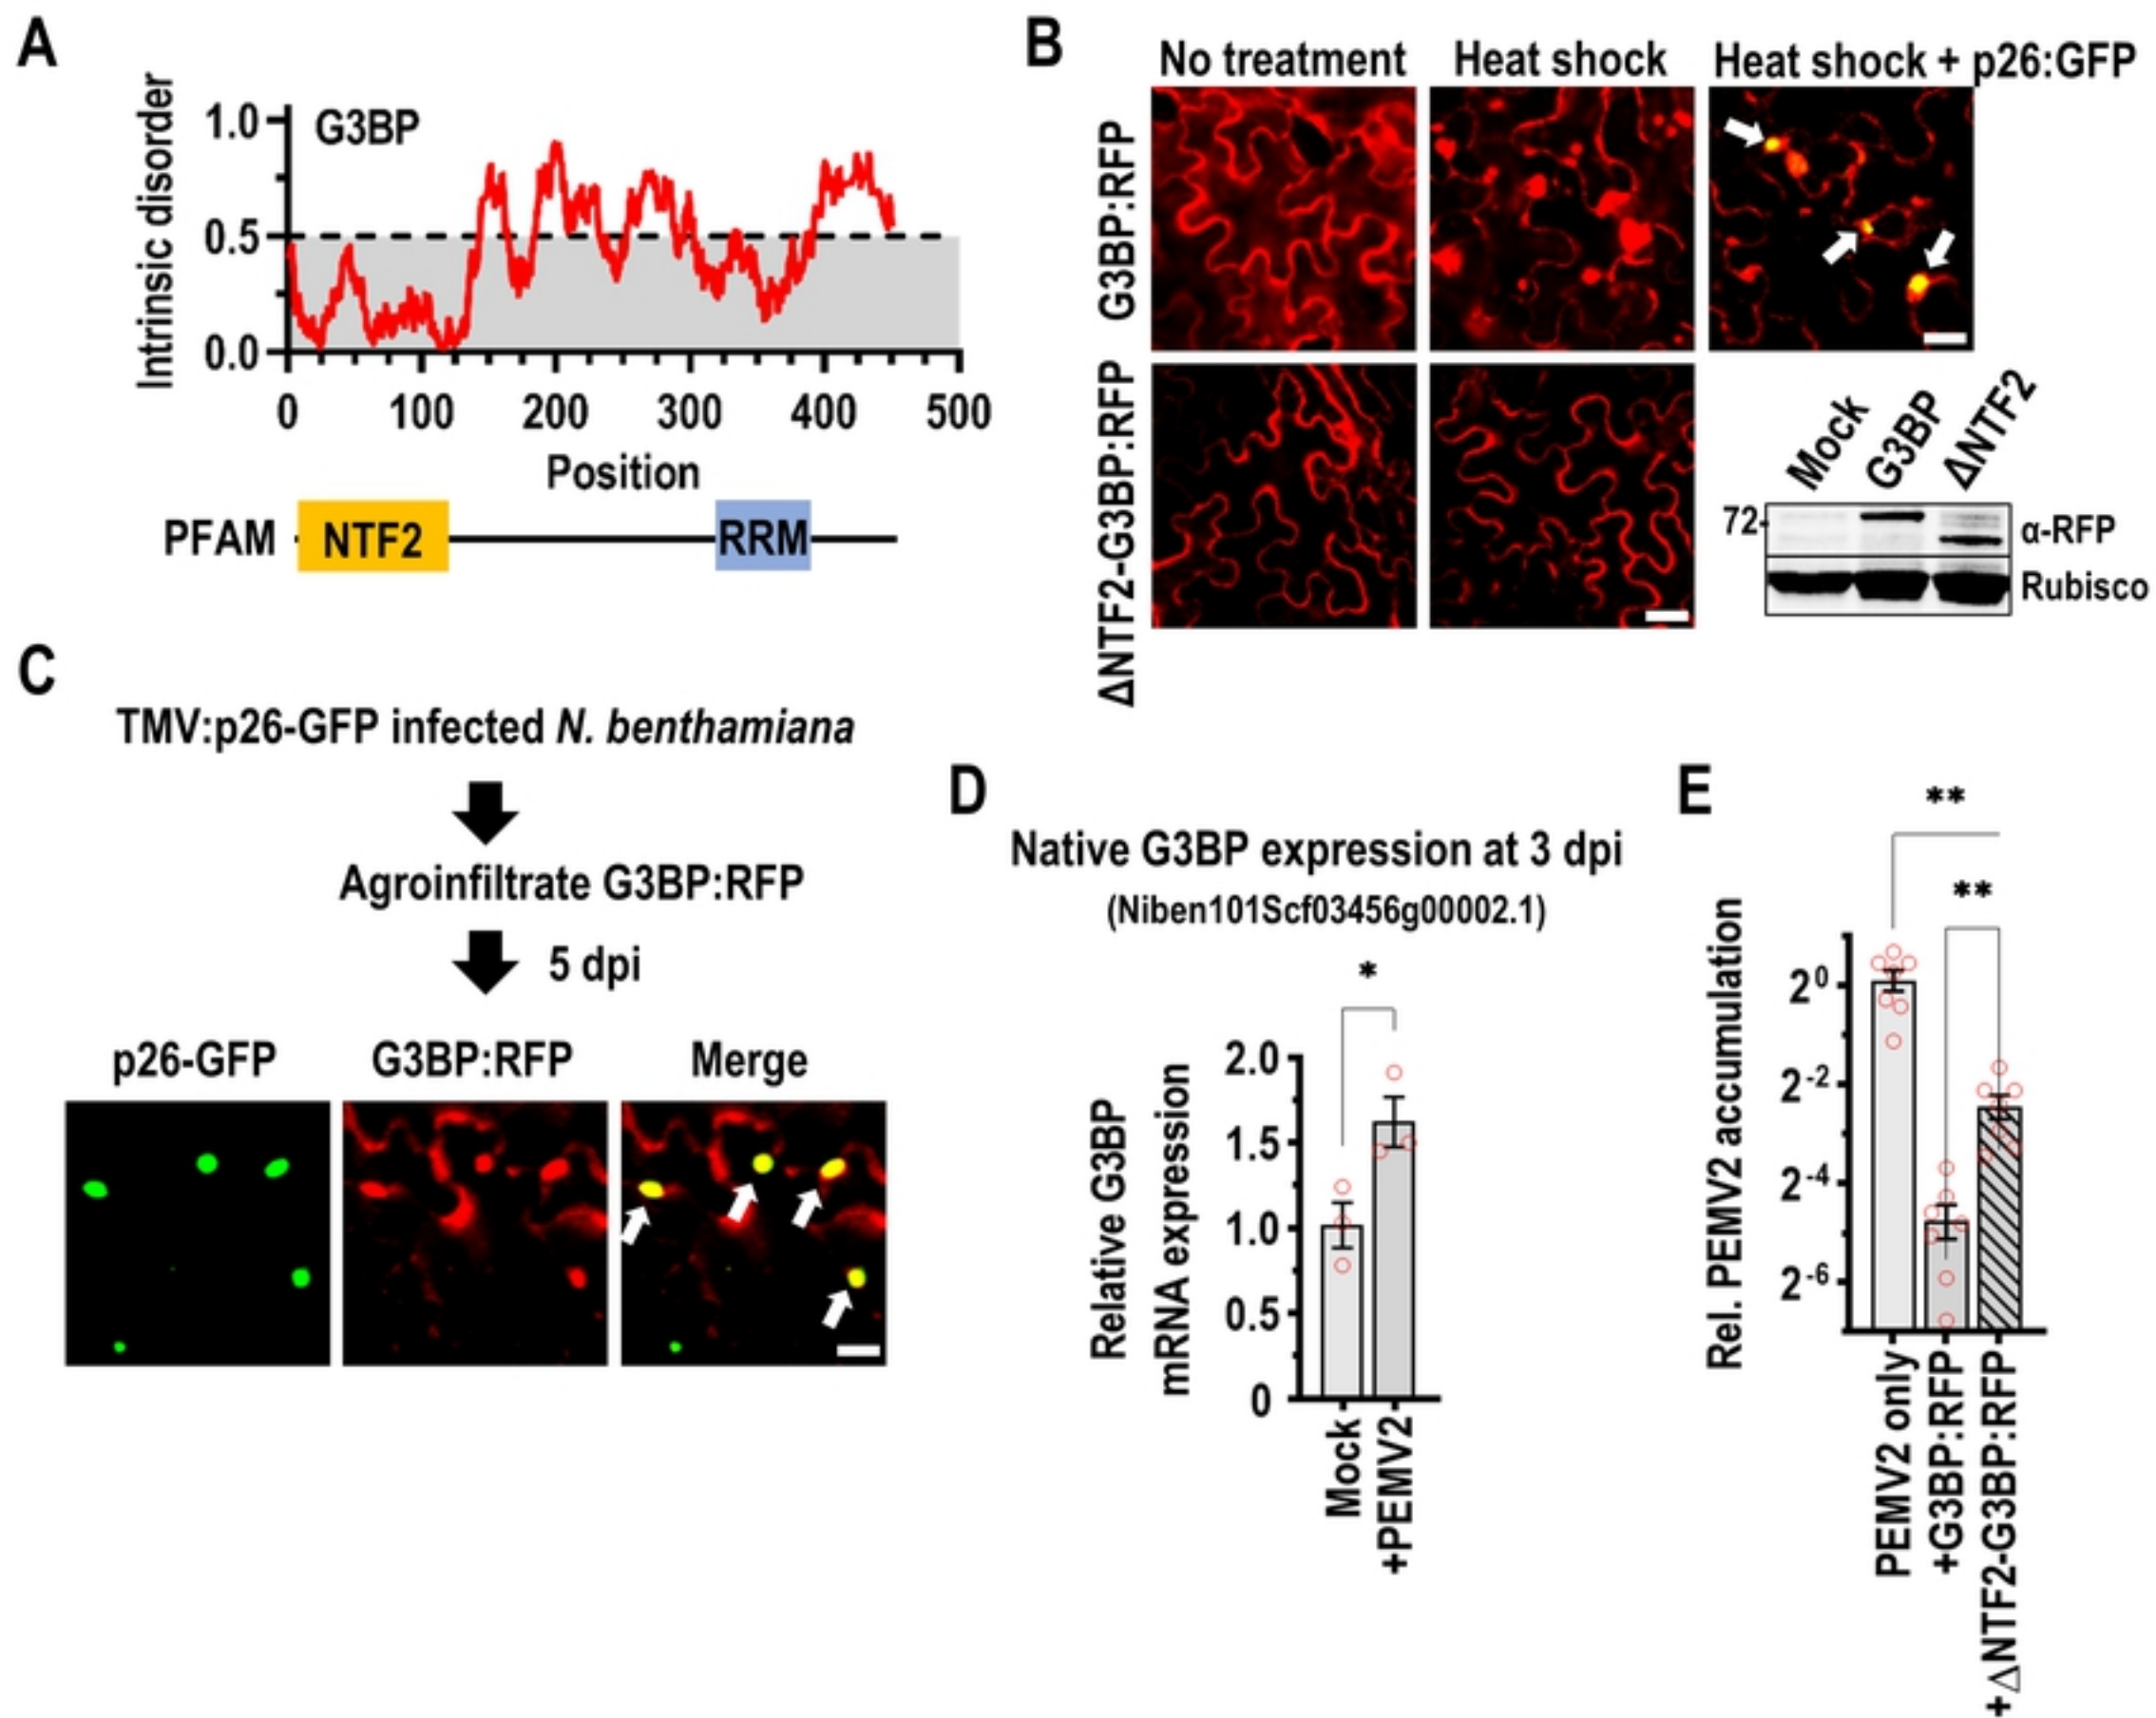

Figure 5
